# Supplementary material for: Protein Topology Determines Cysteine Oxidation Fate: The Case of Sulfenyl Amide Formation among Protein Families
Source: PubMed Central journal article supplement (PMC4351059; doi:10.1371/journal.pcbi.1004051), 2015-03-05
Supplement: pcbi.1004051.s012.pdf [file pcbi.1004051.s012.pdf]

**Table S1. Protein Crystal structures with sulfenyl amide deposited in Protein Data Bank.**

| <b>UniProt</b> | <b>UniProt Name</b>                              | <b>PDBid</b> | <b>Chain</b> | <b>Residue</b> |
|----------------|--------------------------------------------------|--------------|--------------|----------------|
| P18031         | Protein-tyrosine phosphatase 1B                  | 1oes         | A            | 215            |
| P18031         | Protein-tyrosine phosphatase 1B                  | 1oem         | X            | 215            |
| P18031         | Protein-tyrosine phosphatase 1B                  | 3sme         | A            | 215            |
| O53512         | Phospho-2-dehydro-3-deoxyheptonate aldolase AroG | 3nue         | A            | 440            |
