# Supplementary material for: Protein Topology Determines Cysteine Oxidation Fate: The Case of Sulfenyl Amide Formation among Protein Families
Source: PubMed Central journal article supplement (PMC4351059; doi:10.1371/journal.pcbi.1004051), 2015-03-05
Supplement: pcbi.1004051.s013.pdf [file pcbi.1004051.s013.pdf]

**Table S2. Protein Crystal structures with the cysteine between -150 and -90 psi angle**

| PFAM Family | UniProt | PDB  | Chain | ResID | Phi    | Psi    |
|-------------|---------|------|-------|-------|--------|--------|
| PF00102     | M0R726  | 2nv5 | C     | 1424  | -132,5 | -121,7 |
| PF00102     | M0R726  | 2nv5 | B     | 1424  | -131,4 | -129   |
| PF00102     | M0R726  | 2nv5 | A     | 1424  | -127,8 | -125   |
| PF00102     | O68720  | 1qz0 | A     | 403   | -124,5 | -118,4 |
| PF00102     | O68720  | 1qz0 | B     | 403   | -123,9 | -119,1 |
| PF00102     | A3QMF6  | 3f41 | B     | 250   | -128,2 | -124,5 |
| PF00102     | A3QMF6  | 3f41 | A     | 250   | -136,8 | -140,2 |
| PF00102     | O14522  | 2ooq | A     | 1106  | -129,4 | -122,9 |
| PF00102     | O14522  | 2ooq | B     | 1106  | -130,7 | -125   |
| PF00102     | P10586  | 1lar | A     | 1813  | -140   | -124,2 |
| PF00102     | P10586  | 1lar | A     | 1522  | -134,6 | -113,4 |
| PF00102     | P10586  | 1lar | B     | 1522  | -141,7 | -115,1 |
| PF00102     | P10586  | 1lar | B     | 1813  | -134,6 | -120,1 |
| PF00102     | P15273  | 1xxv | A     | 403   | -117,7 | -114,1 |
| PF00102     | P15273  | 1ypt | A     | 403   | -110,3 | -123   |
| PF00102     | P15273  | 1ypt | B     | 403   | -112,3 | -120,4 |
| PF00102     | P15273  | 3f9b | A     | 403   | -111,9 | -124,4 |
| PF00102     | P15273  | 1xxv | B     | 403   | -119,1 | -114,9 |
| PF00102     | P15273  | 2i42 | A     | 403   | -109,1 | -120,9 |
| PF00102     | P15273  | 1ytn | A     | 403   | -124,1 | -118,7 |
| PF00102     | P15273  | 3blt | A     | 403   | -176,5 | -113,3 |
| PF00102     | P15273  | 3f9a | A     | 403   | -109,6 | -121,1 |
| PF00102     | P15273  | 3blu | A     | 403   | -156,1 | -129,9 |
| PF00102     | P15273  | 3f99 | A     | 403   | -106,9 | -123,7 |
| PF00102     | P15273  | 1ytw | A     | 403   | -99,9  | -113,7 |
| PF00102     | P18031  | 2zmm | A     | 215   | -122,1 | -129,8 |
| PF00102     | P18031  | 2f6y | A     | 215   | -128,1 | -130,6 |
| PF00102     | P18031  | 3cwe | A     | 715   | -136,6 | -129   |
| PF00102     | P18031  | 2qbr | A     | 215   | -106   | -118,6 |
| PF00102     | P18031  | 1ecv | A     | 215   | -125   | -142,6 |
| PF00102     | P18031  | 1pxh | A     | 215   | -140   | -131   |
| PF00102     | P18031  | 1c83 | A     | 215   | -119,7 | -144,8 |
| PF00102     | P18031  | 1q6s | A     | 715   | -138,1 | -130,3 |
| PF00102     | P18031  | 3eb1 | A     | 215   | -137,7 | -124,3 |
| PF00102     | P18031  | 1bjz | A     | 215   | -141,2 | -138,8 |
| PF00102     | P18031  | 1l8g | A     | 215   | -120,7 | -132,8 |
| PF00102     | P18031  | 1lqf | C     | 715   | -139,6 | -124   |
| PF00102     | P18031  | 2f6t | A     | 215   | -132,4 | -132,6 |
| PF00102     | P18031  | 1sug | A     | 215   | -134,6 | -135,5 |
| PF00102     | P18031  | 2qbr | A     | 215   | -125   | -128,8 |
| PF00102     | P18031  | 1q6n | A     | 715   | -137,2 | -125,2 |
| PF00102     | P18031  | 1q6t | B     | 1215  | -135,2 | -137,8 |
| PF00102     | P18031  | 1q6p | A     | 715   | -139   | -131,2 |
| PF00102     | P18031  | 2fjm | A     | 715   | -130,1 | -133   |
| PF00102     | P18031  | 2f6w | A     | 215   | -121,8 | -130   |
| PF00102     | P18031  | 2fjn | A     | 715   | -140,8 | -128,7 |
| PF00102     | P18031  | 1t48 | A     | 215   | -137   | -136,1 |
| PF00102     | P18031  | 1q6t | A     | 715   | -134,8 | -129,2 |
| PF00102     | P18031  | 1bzc | A     | 215   | -140   | -138,5 |
| PF00102     | P18031  | 2azr | A     | 215   | -104,5 | -125,5 |
| PF00102     | P18031  | 2qbs | A     | 215   | -124,3 | -124,2 |

Table S2

|         |        |      |   |      |        |        |
|---------|--------|------|---|------|--------|--------|
| PF00102 | P18031 | 1q6s | B | 1215 | -136,9 | -131,7 |
| PF00102 | P18031 | 3i80 | A | 215  | -125,5 | -129,3 |
| PF00102 | P18031 | 1bzh | A | 215  | -137,8 | -129,3 |
| PF00102 | P18031 | 2f6f | A | 215  | -138,6 | -141,1 |
| PF00102 | P18031 | 1c88 | A | 215  | -129,7 | -143,2 |
| PF00102 | P18031 | 2f6v | A | 215  | -131,5 | -134   |
| PF00102 | P18031 | 1lqf | D | 715  | -142,4 | -127,9 |
| PF00102 | P18031 | 1c87 | A | 215  | -125,4 | -139,2 |
| PF00102 | P18031 | 2hb1 | A | 215  | -133,7 | -133,4 |
| PF00102 | P18031 | 1g7g | A | 215  | -140,7 | -141,4 |
| PF00102 | P18031 | 3eax | A | 215  | -136,6 | -125,9 |
| PF00102 | P18031 | 1jf7 | A | 215  | -141,1 | -132,1 |
| PF00102 | P18031 | 3i7z | A | 215  | -132,5 | -137,4 |
| PF00102 | P18031 | 2h4k | A | 215  | -126,3 | -128,6 |
| PF00102 | P18031 | 2f6z | A | 215  | -133,4 | -133,4 |
| PF00102 | P18031 | 2f71 | A | 215  | -128,4 | -135,3 |
| PF00102 | P18031 | 2nta | A | 215  | -132,4 | -129,6 |
| PF00102 | P18031 | 2fjm | B | 715  | -127,6 | -131,2 |
| PF00102 | P18031 | 1jf7 | B | 215  | -137,8 | -137,6 |
| PF00102 | P18031 | 1lqf | A | 715  | -138,3 | -123,2 |
| PF00102 | P18031 | 1gfy | A | 215  | -123,8 | -136,7 |
| PF00102 | P18031 | 1kav | A | 215  | -129,4 | -126,2 |
| PF00102 | P18031 | 2zn7 | A | 215  | -128,1 | -131,3 |
| PF00102 | P18031 | 1g7f | A | 215  | -137,8 | -128,7 |
| PF00102 | P18031 | 1lqf | B | 715  | -139,7 | -129,7 |
| PF00102 | P18031 | 3a5k | A | 215  | -139,5 | -133,6 |
| PF00102 | P18031 | 3sme | A | 215  | -139,6 | -140,9 |
| PF00102 | P18031 | 2b07 | A | 215  | -100,7 | -122,8 |
| PF00102 | P18031 | 1kak | A | 215  | -130,9 | -118,6 |
| PF00102 | P18031 | 1q6p | B | 1215 | -133,1 | -134,7 |
| PF00102 | P18031 | 2fjn | B | 715  | -137,9 | -130,5 |
| PF00102 | P18031 | 1t49 | A | 215  | -132,8 | -138,6 |
| PF00102 | P18031 | 1c86 | A | 215  | -128,2 | -136,4 |
| PF00102 | P18031 | 2f70 | A | 215  | -128,5 | -134,2 |
| PF00102 | P18031 | 2nt7 | A | 215  | -133,9 | -128,1 |
| PF00102 | P18031 | 1q6n | B | 1215 | -139,1 | -131,3 |
| PF00102 | P18031 | 3a5j | A | 215  | -136,7 | -134,7 |
| PF00102 | P18031 | 2h4g | A | 215  | -95    | -123,6 |
| PF00102 | P18031 | 1nwl | A | 215  | -125,4 | -133,5 |
| PF00102 | P18031 | 2qbp | A | 215  | -107,3 | -110,9 |
| PF00102 | P18052 | 1yfo | B | 433  | -132,1 | -128,7 |
| PF00102 | P18052 | 1p15 | B | 724  | -134,4 | -97,3  |
| PF00102 | P18052 | 1yfo | A | 433  | -136,3 | -138,6 |
| PF00102 | P23467 | 2i4g | A | 1904 | -126   | -125,3 |
| PF00102 | P23467 | 2i4h | A | 1904 | -128,2 | -121,3 |
| PF00102 | P23467 | 2hc1 | A | 1904 | -113,1 | -137   |
| PF00102 | P23467 | 2ahs | B | 1904 | -131,1 | -127,9 |
| PF00102 | P23467 | 2i5x | A | 1904 | -130,7 | -127,1 |
| PF00102 | P23467 | 2i5x | B | 1904 | -130,2 | -125,8 |
| PF00102 | P23467 | 2i4e | A | 1904 | -126,5 | -130,9 |
| PF00102 | P23467 | 2i4e | B | 1904 | -129,3 | -130,9 |
| PF00102 | P23467 | 2i3u | A | 1904 | -109,3 | -146,4 |
| PF00102 | P23467 | 2i3r | A | 1904 | -128,5 | -127,8 |
| PF00102 | P23467 | 2i3r | B | 1904 | -122   | -124,9 |

Table S2

|         |        |      |   |      |        |        |
|---------|--------|------|---|------|--------|--------|
| PF00102 | P23467 | 2hc2 | A | 1904 | -121,2 | -136,4 |
| PF00102 | P23467 | 2ahs | A | 1904 | -131,1 | -123,3 |
| PF00102 | P23470 | 3qci | A | 1060 | -120,9 | -116,7 |
| PF00102 | P23470 | 3qcf | A | 1060 | -132,4 | -111,4 |
| PF00102 | P23470 | 3qcj | A | 1060 | -120,2 | -117,6 |
| PF00102 | P23470 | 3qcb | A | 1060 | -124,4 | -119,1 |
| PF00102 | P23470 | 3qcl | A | 1060 | -132,9 | -122,4 |
| PF00102 | P23470 | 3qce | A | 1060 | -125,8 | -120,7 |
| PF00102 | P23470 | 2h4v | A | 1060 | -130,6 | -122,2 |
| PF00102 | P23470 | 3qcb | B | 1060 | -125,6 | -118,3 |
| PF00102 | P23470 | 3qcm | A | 1060 | -132,7 | -122   |
| PF00102 | P23470 | 3qce | B | 1060 | -122,5 | -120,7 |
| PF00102 | P23470 | 3qck | A | 1060 | -125,1 | -121,6 |
| PF00102 | P23470 | 2pbn | A | 1060 | -131,7 | -122   |
| PF00102 | P23470 | 2h4v | B | 1060 | -131,1 | -125,9 |
| PF00102 | P23470 | 3qch | A | 1060 | -121,7 | -120,9 |
| PF00102 | P23470 | 3qcm | B | 1060 | -132,4 | -121,8 |
| PF00102 | P23470 | 3qcf | B | 1060 | -116,6 | -119,9 |
| PF00102 | P23470 | 3qcc | B | 1060 | -116,3 | -124,7 |
| PF00102 | P23470 | 3qcg | A | 1060 | -123,4 | -124,7 |
| PF00102 | P23470 | 3qcn | A | 1060 | -134,9 | -126,8 |
| PF00102 | P23470 | 3qcd | A | 1060 | -125,7 | -122   |
| PF00102 | P23470 | 3qcc | A | 1060 | -122,2 | -124   |
| PF00102 | P26045 | 2b49 | A | 842  | -129,4 | -137,3 |
| PF00102 | P28827 | 1rpm | B | 1095 | -125,3 | -124,9 |
| PF00102 | P28827 | 1rpm | A | 1095 | -125,6 | -124,7 |
| PF00102 | P29074 | 2i75 | A | 852  | -122,1 | -121,2 |
| PF00102 | P35992 | 3s3e | B | 242  | -119,6 | -125,9 |
| PF00102 | P35992 | 3s3e | A | 242  | -129   | -115,9 |
| PF00102 | P74873 | 1g4w | R | 481  | -118,8 | -129,8 |
| PF00102 | Q06124 | 2shp | A | 459  | -133,2 | -127,5 |
| PF00102 | Q06124 | 2shp | B | 459  | -132,7 | -130,9 |
| PF00102 | Q12923 | 1wch | A | 2408 | -143,2 | -122,6 |
| PF00102 | Q13332 | 2fh7 | A | 1880 | -123   | -117   |
| PF00102 | Q13332 | 2fh7 | A | 1589 | -129   | -115,2 |
| PF00102 | Q15256 | 2a8b | A | 588  | -126,5 | -110,6 |
| PF00102 | Q15262 | 2c7s | A | 1083 | -123,1 | -119   |
| PF00102 | Q15678 | 2bzl | A | 1121 | -133,7 | -124,1 |
| PF00102 | Q16827 | 2git | A | 1136 | -127,7 | -115,6 |
| PF00102 | Q16827 | 2g59 | A | 225  | -132   | -121,7 |
| PF00102 | Q16827 | 2git | B | 1136 | -123,7 | -122,9 |
| PF00102 | Q16849 | 2i1y | A | 909  | -129,7 | -114,9 |
| PF00102 | Q16849 | 2i1y | B | 909  | -128,8 | -115,9 |
| PF00102 | Q3MIV7 | 2h04 | A | 1904 | -133,1 | -125,9 |
| PF00102 | Q3MIV7 | 2h03 | A | 1904 | -131,5 | -125,6 |
| PF00102 | Q3MIV7 | 2h02 | A | 1904 | -132   | -127,4 |
| PF00102 | Q3MIV7 | 2h02 | B | 1904 | -134,2 | -125,8 |
| PF00102 | Q59EE0 | 2nlk | A | 1060 | -135,4 | -124   |
| PF00102 | Q62132 | 1jln | A | 480  | -135,5 | -122,9 |
| PF00102 | Q62884 | 3i36 | A | 1118 | -127,5 | -120,5 |
| PF00102 | Q7ARH8 | 2y2f | A | 403  | -115,9 | -122   |
| PF00102 | Q7ARH8 | 2ydu | A | 403  | -118,2 | -119,1 |
| PF00102 | Q7WUJ1 | 3d1o | B | 252  | -130,8 | -138,4 |
| PF00102 | Q7WUJ1 | 1u26 | B | 241  | -141,8 | -141,2 |

Table S2

|         |        |      |   |     |        |        |
|---------|--------|------|---|-----|--------|--------|
| PF00102 | Q7WUJ1 | 2psz | A | 252 | -131   | -144,3 |
| PF00102 | Q7WUJ1 | 3d1q | A | 252 | -129,2 | -136,6 |
| PF00102 | Q7WUJ1 | 2psz | B | 252 | -131   | -143   |
| PF00102 | Q7WUJ1 | 2b4p | A | 252 | -129,8 | -144,1 |
| PF00102 | Q7WUJ1 | 2b4p | B | 252 | -128   | -139,6 |
| PF00102 | Q7WUJ1 | 3d1h | B | 252 | -126,7 | -136,8 |
| PF00102 | Q7WUJ1 | 1u26 | A | 241 | -121,9 | -142,4 |
| PF00102 | Q7WUJ1 | 3d1q | B | 252 | -129   | -138,1 |
| PF00102 | Q7WUJ1 | 3d1o | A | 252 | -127,9 | -142,3 |
| PF00102 | Q7WUJ1 | 3d1h | A | 252 | -134,4 | -146   |
| PF00102 | Q92932 | 2qep | B | 945 | -142,9 | -102,9 |
| PF00102 | Q92932 | 2qep | A | 945 | -140,2 | -101,6 |
| PF00102 | Q97VZ7 | 2i6j | A | 96  | -129,9 | -132,7 |
| PF00102 | Q97VZ7 | 2i6i | A | 96  | -125,2 | -138,8 |
| PF00102 | Q97VZ7 | 3ro1 | A | 96  | -132,7 | -138,1 |
| PF00102 | Q97VZ7 | 2i6m | A | 96  | -129,4 | -136,8 |
| PF00102 | Q99952 | 2oc3 | A | 229 | -129,7 | -139,2 |
| PF00102 | Q9Y2R2 | 2p6x | B | 227 | -125,2 | -138   |
| PF00102 | Q9Y2R2 | 2p6x | A | 227 | -128   | -132,3 |
| PF00117 | O59071 | 1wl8 | A | 79  | 57,9   | -102,4 |
| PF00117 | O59071 | 2d7j | A | 79  | 55,4   | -103,1 |
| PF00117 | P00900 | 1i7q | B | 85  | 57,3   | -94,5  |
| PF00117 | P00900 | 1i7s | B | 85  | 58     | -112,3 |
| PF00117 | P00900 | 1i7q | D | 85  | 58,5   | -95,3  |
| PF00117 | P00900 | 1i7s | D | 85  | 50,7   | -102,7 |
| PF00117 | P00905 | 1i1q | B | 83  | 59,9   | -115   |
| PF00117 | P00907 | 1jdb | F | 269 | 58,3   | -107,7 |
| PF00117 | P00907 | 1jdb | C | 269 | 57,6   | -95,6  |
| PF00117 | P00907 | 1jdb | I | 269 | 53,4   | -109,2 |
| PF00117 | P00907 | 1m6v | B | 269 | 60,8   | -112,4 |
| PF00117 | P00907 | 1m6v | H | 269 | 59,5   | -108,8 |
| PF00117 | P00907 | 1t36 | H | 269 | 56,2   | -110,3 |
| PF00117 | P00907 | 1m6v | D | 269 | 52,6   | -108,3 |
| PF00117 | P00907 | 1m6v | F | 269 | 56,8   | -119,4 |
| PF00117 | P00907 | 1t36 | B | 269 | 63,9   | -106,7 |
| PF00117 | P00907 | 1t36 | F | 269 | 57,9   | -113,9 |
| PF00117 | P00907 | 1jdb | L | 269 | 68,5   | -110   |
| PF00117 | P00907 | 1t36 | D | 269 | 65,3   | -110,6 |
| PF00117 | P04079 | 1gpm | C | 86  | 56,8   | -111,8 |
| PF00117 | P04079 | 1gpm | D | 86  | 51,9   | -112,9 |
| PF00117 | P04079 | 1gpm | B | 86  | 56,8   | -110,7 |
| PF00117 | P04079 | 1gpm | A | 86  | 51,8   | -104,6 |
| PF00117 | P0A6F1 | 1bxr | H | 269 | 55     | -97,4  |
| PF00117 | P0A6F1 | 1bxr | B | 269 | 67,3   | -99,9  |
| PF00117 | P0A6F1 | 1ce8 | F | 269 | 58,6   | -103,8 |
| PF00117 | P0A6F1 | 1bxr | D | 269 | 56,6   | -99,7  |
| PF00117 | P0A6F1 | 1ce8 | H | 269 | 51,5   | -93,5  |
| PF00117 | P0A6F1 | 1bxr | F | 269 | 62,1   | -113,4 |
| PF00117 | P0A6F1 | 1ce8 | D | 269 | 60,3   | -107,3 |
| PF00117 | P0A6F1 | 1ce8 | B | 269 | 62,4   | -103,8 |
| PF00117 | P0A7E5 | 1s1m | A | 379 | 52,1   | -114,1 |
| PF00117 | P0A7E5 | 1s1m | B | 379 | 56,5   | -111,4 |
| PF00117 | P33734 | 1ox6 | B | 83  | 58,2   | -111,8 |
| PF00117 | P33734 | 1ox4 | A | 83  | 59,6   | -99,2  |

Table S2

|         |        |      |   |     |        |        |
|---------|--------|------|---|-----|--------|--------|
| PF00117 | P33734 | 1ox6 | A | 83  | 55,4   | -110,4 |
| PF00117 | P49915 | 2vx0 | B | 104 | 55,2   | -98,7  |
| PF00117 | P49915 | 2vpi | B | 104 | 54,6   | -111,5 |
| PF00117 | P49915 | 2vx0 | A | 104 | 73,3   | -105,5 |
| PF00117 | P49915 | 2vpi | A | 104 | 56,2   | -108,7 |
| PF00117 | Q06129 | 1qdl | B | 84  | 60,5   | -110,7 |
| PF00117 | Q1H479 | 3m3p | A | 89  | 58,2   | -114,4 |
| PF00117 | Q5SI28 | 2ywc | C | 78  | 50,5   | -106,3 |
| PF00117 | Q5SI28 | 2ywc | A | 78  | 54,9   | -100,1 |
| PF00117 | Q5SI28 | 2ywc | D | 78  | 50     | -101,6 |
| PF00117 | Q5SI28 | 2ywb | C | 78  | 56,2   | -112,8 |
| PF00117 | Q5SI28 | 2ywc | B | 78  | 53,5   | -113   |
| PF00117 | Q5SI28 | 2ywb | B | 78  | 47,9   | -108,8 |
| PF00117 | Q5SI28 | 2ywb | D | 78  | 58,4   | -108   |
| PF00117 | Q5SI28 | 2ywb | A | 78  | 55,3   | -108,9 |
| PF00117 | Q5SIA8 | 1vcm | A | 391 | 52,4   | -106,2 |
| PF00117 | Q5SIA8 | 1vco | A | 391 | 51,2   | -98,2  |
| PF00117 | Q5SIA8 | 1vcn | A | 391 | 53     | -98,1  |
| PF00117 | Q7SIC0 | 1ka9 | H | 82  | 55,8   | -100,4 |
| PF00117 | Q980S6 | 3nva | B | 386 | 59,3   | -111,3 |
| PF00117 | Q980S6 | 3nva | A | 386 | 66,8   | -117,5 |
| PF00117 | Q9HJM3 | 2a9v | B | 80  | 59,2   | -109,3 |
| PF00117 | Q9HJM3 | 2a9v | C | 80  | 55,4   | -110,6 |
| PF00117 | Q9HJM3 | 2a9v | A | 80  | 53,7   | -107,8 |
| PF00117 | Q9HJM3 | 2a9v | D | 80  | 57,3   | -110,2 |
| PF00117 | Q9NRF8 | 2vkt | A | 399 | 65,9   | -110,9 |
| PF00117 | Q9X0C8 | 1gpw | B | 84  | 67     | -132,9 |
| PF00117 | Q9X0C8 | 1k9v | F | 384 | 59,1   | -120,8 |
| PF00117 | Q9X0C8 | 1gpw | F | 84  | 46,2   | -117,1 |
| PF00117 | Q9X0C8 | 1gpw | D | 84  | 53,4   | -103,4 |
| PF00581 | E2QRA0 | 3p3a | B | 246 | -144,3 | -126,5 |
| PF00581 | E2QRA0 | 3p3a | A | 246 | -144,2 | -133,6 |
| PF00581 | O05793 | 3hwi | A | 233 | -131,3 | -137,6 |
| PF00581 | O05793 | 3hwi | B | 233 | -135,6 | -138,6 |
| PF00581 | O05793 | 3aax | A | 233 | -143,5 | -143,9 |
| PF00581 | O05793 | 3aax | B | 233 | -160   | -142,6 |
| PF00581 | P00586 | 1orb | A | 247 | -161   | -128,6 |
| PF00581 | P25325 | 3olh | A | 248 | -165,2 | -148,8 |
| PF00581 | P30304 | 1c25 | A | 430 | -134,4 | -128,6 |
| PF00581 | P30305 | 2ifd | A | 473 | -135,9 | -140,3 |
| PF00581 | P42937 | 3f4a | A | 90  | -130,2 | -137,4 |
| PF00581 | P42937 | 3f4a | B | 90  | -129,8 | -141,5 |
| PF00581 | P52197 | 1h4m | X | 230 | -139,7 | -125,3 |
| PF00581 | P52197 | 1h4k | X | 230 | -139,7 | -139,1 |
| PF00581 | P78067 | 3ipp | B | 385 | -143,8 | -130,2 |
| PF00581 | P78067 | 3ipp | A | 385 | -156,2 | -127,9 |
| PF00581 | P96888 | 3hzu | A | 245 | -143,1 | -119,4 |
| PF00581 | Q12305 | 3d1p | A | 98  | -134,3 | -124,1 |
| PF00581 | Q5SHV8 | 2eg4 | A | 191 | -157,2 | -131,1 |
| PF00581 | Q6Q1Q5 | 2j6p | F | 75  | -125,4 | -138,4 |
| PF00581 | Q6Q1Q5 | 2j6p | E | 75  | -126,5 | -132,3 |
| PF00581 | Q6Q1Q5 | 2j6p | D | 75  | -134,4 | -133,5 |
| PF00581 | Q6Q1Q5 | 2j6p | C | 75  | -137,2 | -137,4 |
| PF00581 | Q6Q1Q5 | 2j6p | B | 75  | -137,5 | -136,1 |

Table S2

|         |        |      |   |      |        |        |
|---------|--------|------|---|------|--------|--------|
| PF00581 | Q6Q1Q5 | 2j6p | A | 75   | -135,4 | -134,4 |
| PF00581 | Q81UT5 | 3icr | A | 514  | -119,5 | -147,3 |
| PF00581 | Q81UT5 | 3ics | A | 514  | -124,1 | -144,9 |
| PF01965 | A9CJS5 | 2fex | B | 101  | 67,8   | -137,1 |
| PF01965 | A9CJS5 | 2fex | A | 101  | 62,4   | -131,2 |
| PF01965 | A9CJS5 | 2fex | C | 101  | 67,4   | -135,6 |
| PF01965 | B6YXG0 | 3l18 | A | 100  | 63,7   | -120,6 |
| PF01965 | B6YXG0 | 3l18 | B | 100  | 61,7   | -116,7 |
| PF01965 | O59413 | 1g2i | A | 100  | 59,7   | -115,1 |
| PF01965 | O59413 | 1g2i | C | 500  | 61,3   | -118,5 |
| PF01965 | O59413 | 1g2i | B | 300  | 60,9   | -119,3 |
| PF01965 | P31658 | 1n57 | A | 185  | 65,5   | -116   |
| PF01965 | P31658 | 1ons | A | 184  | 56,9   | -115,3 |
| PF01965 | P96658 | 3f5d | A | 100  | 54,8   | -127,8 |
| PF01965 | Q04432 | 1rw7 | A | 138  | 70,4   | -121,9 |
| PF01965 | Q08914 | 3kkl | A | 138  | 75,3   | -116   |
| PF01965 | Q08914 | 3kkl | B | 138  | 72,7   | -123,4 |
| PF01965 | Q2GI86 | 3l3b | A | 137  | 64,5   | -113,8 |
| PF01965 | Q2GI86 | 3l3b | B | 137  | 67,7   | -113,6 |
| PF01965 | Q46948 | 2ab0 | A | 106  | 55,7   | -112,2 |
| PF01965 | Q46948 | 2ab0 | B | 106  | 72,7   | -115   |
| PF01965 | Q81PY3 | 3efe | B | 110  | 65,3   | -130,9 |
| PF01965 | Q81PY3 | 3efe | F | 110  | 60,1   | -131,2 |
| PF01965 | Q81PY3 | 3efe | C | 110  | 64,4   | -121   |
| PF01965 | Q81PY3 | 3efe | A | 110  | 66,6   | -133,8 |
| PF01965 | Q81PY3 | 3efe | E | 110  | 60     | -121,6 |
| PF01965 | Q81PY3 | 3efe | D | 110  | 71,3   | -127,2 |
| PF01965 | Q8A8A4 | 3cne | D | 111  | 52,7   | -106,4 |
| PF01965 | Q8A8A4 | 3cne | C | 111  | 51,7   | -104,1 |
| PF01965 | Q8A8A4 | 3cne | A | 111  | 58,6   | -111,9 |
| PF01965 | Q8A8A4 | 3cne | B | 111  | 59,9   | -111,8 |
| PF01965 | Q99497 | 1pdw | H | 3306 | 68     | -108,5 |
| PF01965 | Q99497 | 1pdw | C | 1106 | 64,1   | -104,8 |
| PF01965 | Q99497 | 2or3 | A | 106  | 72,5   | -107,4 |
| PF01965 | Q99497 | 2r1u | A | 106  | 64,9   | -108,6 |
| PF01965 | Q99497 | 3cz9 | A | 106  | 78,5   | -102,7 |
| PF01965 | Q99497 | 3cza | A | 106  | 65,9   | -104,7 |
| PF01965 | Q99497 | 1pdv | A | 106  | 66,4   | -114,2 |
| PF01965 | Q99497 | 3cy6 | A | 106  | 72,3   | -110,5 |
| PF01965 | Q99497 | 3sf8 | B | 106  | 75,6   | -105,6 |
| PF01965 | Q99497 | 3bwe | D | 706  | 63,1   | -114,5 |
| PF01965 | Q99497 | 1q2u | A | 106  | 66,5   | -113   |
| PF01965 | Q99497 | 1pe0 | B | 306  | 65,4   | -107,2 |
| PF01965 | Q99497 | 2or3 | B | 106  | 72     | -106,4 |
| PF01965 | Q99497 | 1pdw | F | 2306 | 60,6   | -111,6 |
| PF01965 | Q99497 | 1pdw | B | 306  | 63,1   | -108,4 |
| PF01965 | Q99497 | 1ucf | A | 106  | 66,1   | -110,9 |
| PF01965 | Q99497 | 3bwe | G | 1306 | 62,2   | -110,5 |
| PF01965 | Q99497 | 1pe0 | A | 106  | 66,3   | -106,2 |
| PF01965 | Q99497 | 3bwe | A | 106  | 70,5   | -105,6 |
| PF01965 | Q99497 | 3b38 | A | 106  | 74,7   | -107,1 |
| PF01965 | Q99497 | 1pdw | D | 1306 | 60,1   | -109,1 |
| PF01965 | Q99497 | 1pdw | G | 3106 | 57,9   | -106,8 |
| PF01965 | Q99497 | 2r1u | B | 106  | 65,5   | -107,8 |

Table S2

|         |        |      |   |      |        |        |
|---------|--------|------|---|------|--------|--------|
| PF01965 | Q99497 | 1p5f | A | 106  | 77     | -101   |
| PF01965 | Q99497 | 3bwe | E | 906  | 73,3   | -107,6 |
| PF01965 | Q99497 | 3bwe | B | 306  | 69,8   | -106,5 |
| PF01965 | Q99497 | 1j42 | A | 106  | 64,5   | -113,4 |
| PF01965 | Q99497 | 3b3a | A | 106  | 73,2   | -113,1 |
| PF01965 | Q99497 | 3b36 | A | 106  | 73,7   | -112,1 |
| PF01965 | Q99497 | 1ucf | B | 106  | 65     | -107,9 |
| PF01965 | Q99497 | 1pdw | E | 2106 | 69,3   | -95,9  |
| PF01965 | Q99497 | 1pdw | A | 106  | 65,5   | -104,1 |
| PF01965 | Q99497 | 3bwe | C | 506  | 65,1   | -108,2 |
| PF01965 | Q9HEU1 | 3n7t | A | 141  | 79,7   | -100,6 |
| PF01965 | Q9KPQ8 | 3ot1 | A | 108  | 64,8   | -125,8 |
| PF00782 | O95147 | 2wgp | A | 111  | -128,9 | -139   |
| PF00782 | O95147 | 2wgp | B | 111  | -123,2 | -140,3 |
| PF00782 | P24656 | 1yn9 | C | 119  | -124,3 | -148,1 |
| PF00782 | P24656 | 1yn9 | B | 119  | -123,6 | -146,4 |
| PF00782 | P33064 | 2p4d | A | 110  | -126,1 | -142,7 |
| PF00782 | P51452 | 1vhr | B | 124  | -141,6 | -143,6 |
| PF00782 | P51452 | 3f81 | B | 124  | -138,5 | -143,3 |
| PF00782 | P51452 | 1vhr | A | 124  | -146,7 | -148,1 |
| PF00782 | P51452 | 3f81 | A | 124  | -137,2 | -146,8 |
| PF00782 | P60484 | 1d5r | A | 124  | -129,3 | -126,3 |
| PF00782 | Q4QEZ7 | 3s4o | A | 112  | -131,5 | -103,5 |
| PF00782 | Q66GT5 | 3rgo | A | 102  | -124,9 | -103,6 |
| PF00782 | Q68J44 | 2y96 | A | 147  | -134,4 | -132,9 |
| PF00782 | Q68J44 | 2y96 | B | 147  | -139,7 | -149,2 |
| PF00782 | Q8NEJ0 | 2esb | A | 104  | -138,2 | -143,3 |
| PF00782 | Q9BVJ7 | 2img | A | 95   | -137,6 | -146,4 |
| PF00782 | Q9NRW4 | 1wrm | A | 88   | -131,4 | -143,8 |
| PF00782 | Q9UII6 | 2pq5 | C | 138  | -134,9 | -133,8 |
| PF00782 | Q9UII6 | 2pq5 | D | 138  | -131,8 | -129,8 |
| PF00782 | Q9UII6 | 2pq5 | B | 138  | -127,2 | -141,6 |
| PF00782 | Q9UII6 | 2gwo | D | 138  | -123   | -147,4 |
| PF00782 | Q9UII6 | 2pq5 | A | 138  | -136,6 | -129,7 |
| PF00782 | Q9Y6W6 | 1zzw | B | 408  | -139,6 | -119,4 |
| PF00782 | Q9Y6W6 | 1zzw | A | 408  | -135,1 | -136,3 |
| PF00795 | O25836 | 2dyv | B | 166  | 53     | -106,1 |
| PF00795 | O25836 | 2dyv | A | 166  | 52,2   | -107,2 |
| PF00795 | O25836 | 2dyu | B | 166  | 50,6   | -114,9 |
| PF00795 | O25836 | 2dyu | A | 166  | 53     | -116,8 |
| PF00795 | P49954 | 1f89 | B | 469  | 32,4   | -97,5  |
| PF00795 | P49954 | 1f89 | A | 169  | 33,3   | -98,3  |
| PF00795 | P60327 | 1erz | A | 171  | 43,7   | -117,3 |
| PF00795 | P60327 | 1erz | B | 171  | 43,3   | -116,2 |
| PF00795 | Q44185 | 1fo6 | C | 172  | 47,3   | -117,8 |
| PF00795 | Q44185 | 2ggl | C | 172  | 45,6   | -117,3 |
| PF00795 | Q44185 | 1fo6 | A | 172  | 45,4   | -116,6 |
| PF00795 | Q44185 | 2ggl | B | 172  | 53,3   | -110,2 |
| PF00795 | Q44185 | 2ggk | D | 172  | 39     | -105,6 |
| PF00795 | Q44185 | 1fo6 | D | 172  | 48,1   | -119,8 |
| PF00795 | Q44185 | 2ggl | A | 172  | 47,9   | -113,3 |
| PF00795 | Q44185 | 2ggk | B | 172  | 52,1   | -109,2 |
| PF00795 | Q44185 | 2ggk | A | 172  | 47,7   | -112,4 |
| PF00795 | Q44185 | 1fo6 | B | 172  | 47,4   | -106,6 |

Table S2

|         |        |           |   |     |        |        |
|---------|--------|-----------|---|-----|--------|--------|
| PF00795 | Q44185 | 2ggl      | D | 172 | 37     | -106,7 |
| PF00795 | Q44185 | 2ggk      | C | 172 | 49,1   | -116,1 |
| PF00795 | Q82AV7 | 3n05      | B | 161 | 36,2   | -94,6  |
| PF00795 | Q82AV7 | 3n05      | A | 161 | 34,6   | -103,7 |
| PF00795 | Q8P8M3 | 2,00E+011 | D | 143 | 41,8   | -107,9 |
| PF00795 | Q8P8M3 | 2,00E+011 | A | 143 | 37,2   | -102,6 |
| PF00795 | Q8P8M3 | 2,00E+011 | C | 143 | 41,7   | -104,9 |
| PF00795 | Q8P8M3 | 2,00E+011 | B | 143 | 37,6   | -107,1 |
| PF00795 | Q9L543 | 2plq      | A | 166 | 45,6   | -109,1 |
| PF01174 | Q5ND68 | 2abw      | A | 87  | 53,2   | -109,5 |
| PF01174 | Q5ND68 | 2abw      | B | 87  | 54,7   | -110,4 |
| PF01174 | P37528 | 2nv2      | P | 79  | 66,3   | -99,6  |
| PF01174 | P37528 | 2nv2      | B | 79  | 73,9   | -100   |
| PF01174 | P37528 | 2nv2      | V | 79  | 68,4   | -95,1  |
| PF01174 | P37528 | 2nv2      | R | 79  | 70     | -102,8 |
| PF01174 | P37528 | 1r9g      | B | 79  | 50,1   | -134,8 |
| PF01174 | P37528 | 2nv2      | N | 79  | 60,9   | -94,7  |
| PF01174 | P37528 | 2nv2      | J | 79  | 67     | -102   |
| PF01174 | P37528 | 2nv0      | B | 79  | 49,4   | -130,5 |
| PF01174 | P37528 | 2nv2      | X | 79  | 66,5   | -101   |
| PF01174 | P37528 | 2nv2      | H | 79  | 63,1   | -101,1 |
| PF01174 | P37528 | 2nv2      | L | 79  | 66,5   | -99,1  |
| PF01174 | P37528 | 2nv2      | D | 79  | 63,5   | -103,6 |
| PF01174 | P37528 | 2nv0      | A | 79  | 53,2   | -120,8 |
| PF01174 | P37528 | 1r9g      | A | 79  | 47,4   | -124,4 |
| PF01174 | P37528 | 2nv2      | F | 79  | 58,4   | -103,1 |
| PF01174 | P37528 | 2nv2      | T | 79  | 58,5   | -99,8  |
| PF01174 | P83813 | 1q7r      | A | 78  | 54,2   | -136   |
| PF01174 | Q59055 | 2ywj      | A | 75  | 56,5   | -99,4  |
| PF01174 | Q5SKD6 | 2ywd      | A | 81  | 61,2   | -108,7 |
| PF13278 | A3QGX4 | 3bhn      | A | 100 | 47,9   | -124,8 |
| PF13278 | Q4K977 | 3nor      | A | 104 | 65,2   | -134,3 |
| PF13278 | Q4K977 | 3nov      | A | 104 | 49,9   | -131,6 |
| PF13278 | Q881P0 | 3ewn      | A | 154 | 59,8   | -143   |
| PF13278 | Q97FB4 | 3mgk      | A | 102 | 60,1   | -142,5 |
| PF13278 | Q97FB4 | 3mgk      | B | 102 | 56,7   | -137,1 |
| PF00300 | P07953 | 1tip      | A | 142 | -128,5 | -137,3 |
| PF00300 | P07953 | 1tip      | B | 142 | -131,4 | -135,8 |
| PF00300 | P07953 | 1c80      | A | 142 | -125,6 | -140,5 |
| PF00300 | P07953 | 1fbt      | B | 141 | -125,9 | -135,8 |
| PF00300 | P07953 | 1c80      | B | 142 | -124,2 | -136,3 |
| PF00300 | P07953 | 1fbt      | A | 141 | -132,8 | -132,9 |
| PF00300 | P07953 | 1c81      | A | 391 | -124,2 | -132,6 |
| PF00300 | P16118 | 1k6m      | B | 391 | -133   | -128,5 |
| PF00300 | P16118 | 1k6m      | A | 391 | -132,8 | -127,6 |
| PF00300 | P25114 | 1bif      | A | 389 | -132,9 | -134,3 |
| PF00300 | P25114 | 2bif      | B | 389 | -132,1 | -133   |
| PF00300 | P25114 | 3bif      | A | 389 | -132,3 | -138,7 |
| PF00300 | P25114 | 2bif      | A | 389 | -132,4 | -130,2 |
| PF00300 | Q16875 | 2axn      | A | 386 | -133,1 | -134,8 |
| PF00300 | Q16875 | 3qpw      | A | 386 | -140,5 | -134,3 |
| PF00300 | Q16875 | 2dwo      | A | 386 | -131,5 | -138,4 |
| PF00300 | Q16875 | 3qpu      | A | 386 | -138   | -135,2 |
| PF00300 | Q16875 | 2i1v      | B | 386 | -138,6 | -131,9 |



Table S2

|         |        |      |   |     |        |        |
|---------|--------|------|---|-----|--------|--------|
| PF13350 | A1QMT0 | 2oz5 | A | 160 | -130,8 | -124,5 |
| PF13350 | A1QMT0 | 2oz5 | B | 160 | -131,9 | -119,2 |
| PF13350 | A3QMF6 | 3f41 | A | 548 | -124,9 | -134,8 |
| PF13350 | A3QMF6 | 3f41 | B | 548 | -131,6 | -134,9 |
| PF13350 | P96830 | 1ywf | A | 160 | -127,3 | -126,5 |
| PF00106 | A4VVQ2 | 3cxr | A | 149 | -93,5  | -139,6 |
| PF00106 | A4VVQ2 | 3o03 | A | 149 | -92,5  | -140,5 |
| PF00106 | P10807 | 1b16 | B | 137 | -99,5  | -114,8 |
| PF00106 | P10807 | 1b2l | A | 137 | -103,6 | -111,6 |
| PF00106 | P10807 | 1a4u | B | 137 | -108,9 | -118,1 |
| PF00106 | P10807 | 1b16 | A | 137 | -99    | -114,3 |
| PF00106 | P10807 | 1a4u | A | 137 | -109   | -118,2 |
| PF00106 | P10807 | 1sby | A | 137 | -114,9 | -115   |
| PF00106 | P10807 | 1b15 | B | 137 | -105,2 | -112,9 |
| PF00106 | P10807 | 1b15 | A | 137 | -95,4  | -113,3 |
| PF00106 | P10807 | 1sby | B | 137 | -101,1 | -115,4 |
| PF00106 | P10807 | 1b14 | A | 137 | -102   | -108,8 |
| PF00106 | P10807 | 1b14 | B | 137 | -101,6 | -109,5 |
| PF00106 | Q48436 | 1geg | A | 138 | -110,1 | -141,8 |
| PF00106 | Q48436 | 1geg | G | 138 | -109,4 | -141,9 |
| PF00106 | Q48436 | 1geg | F | 138 | -109,9 | -140,8 |
| PF00106 | Q48436 | 1geg | B | 138 | -109,4 | -139,7 |
| PF00106 | Q48436 | 1geg | C | 138 | -110   | -141,7 |
| PF00106 | Q48436 | 1geg | D | 138 | -112   | -142,8 |
| PF00106 | Q48436 | 1geg | E | 138 | -110,7 | -141,5 |
| PF00106 | Q48436 | 1geg | H | 138 | -109,5 | -142,1 |
| PF01909 | P06766 | 2van | A | 178 | -105,8 | -140,9 |
| PF01909 | P06766 | 1zqx | A | 178 | -81,9  | -140,3 |
| PF01909 | P06766 | 1zqy | A | 178 | -94,2  | -145,3 |
| PF01909 | P06766 | 1bpb | A | 178 | -88,1  | -145,5 |
| PF01909 | P06766 | 1jn3 | A | 178 | -103,5 | -143,8 |
| PF01909 | Q5SJ64 | 3au2 | A | 186 | -113,5 | -138,9 |
| PF01909 | Q9UGP5 | 2pfn | A | 415 | -111   | -141,3 |
| PF01909 | Q9UGP5 | 1xsp | A | 415 | -110,3 | -136,7 |
| PF01909 | Q9UGP5 | 2gws | M | 415 | -106,4 | -133,8 |
| PF01909 | Q9UGP5 | 3mda | A | 415 | -114,9 | -137,4 |
| PF01909 | Q9UGP5 | 1xsl | I | 415 | -107,9 | -134,4 |
| PF01909 | Q9UGP5 | 3pnc | A | 415 | -104,5 | -134,2 |
| PF01909 | Q9UGP5 | 2gws | E | 415 | -97,6  | -136,9 |
| PF01909 | Q9UGP5 | 3c5f | B | 415 | -106,3 | -137,4 |
| PF01909 | Q9UGP5 | 2gws | I | 415 | -103,2 | -136,7 |
| PF01909 | Q9UGP5 | 1rzt | E | 415 | -110,2 | -136,4 |
| PF01909 | Q9UGP5 | 3c5f | A | 415 | -107,9 | -136,6 |
| PF01909 | Q9UGP5 | 2pfo | A | 415 | -110,6 | -132,5 |
| PF01909 | Q9UGP5 | 2gws | A | 415 | -103,7 | -134,1 |
| PF01909 | Q9UGP5 | 3mgh | C | 415 | -108,6 | -134,5 |
| PF01909 | Q9UGP5 | 3c5g | A | 415 | -109,1 | -141,4 |
| PF01909 | Q9UGP5 | 1rzt | I | 415 | -106,1 | -137,4 |
| PF01909 | Q9UGP5 | 1rzt | A | 415 | -106,6 | -133,9 |
| PF01909 | Q9UGP5 | 1xsn | A | 415 | -109,7 | -138   |
| PF01909 | Q9UGP5 | 2bcv | A | 415 | -117,1 | -142,4 |
| PF01909 | Q9UGP5 | 2bcu | A | 415 | -114,2 | -140,8 |
| PF01909 | Q9UGP5 | 3mgh | A | 415 | -108,9 | -138,7 |
| PF01909 | Q9UGP5 | 2bcs | A | 415 | -115,6 | -142   |

Table S2

|         |        |      |   |     |        |        |
|---------|--------|------|---|-----|--------|--------|
| PF01909 | Q9UGP5 | 1xsl | M | 415 | -108,7 | -138,8 |
| PF01909 | Q9UGP5 | 2pfp | A | 415 | -118,4 | -134   |
| PF01909 | Q9UGP5 | 3pmn | A | 415 | -102,3 | -131,2 |
| PF01909 | Q9UGP5 | 1rzt | M | 415 | -107,2 | -135,8 |
| PF01909 | Q9UGP5 | 1xsl | E | 415 | -104,2 | -139   |
| PF01909 | Q9UGP5 | 2pfq | A | 415 | -104,7 | -137,4 |
| PF01909 | Q9UGP5 | 2bcq | A | 415 | -110,6 | -138,7 |
| PF01909 | Q9UGP5 | 3c5g | B | 415 | -112,5 | -139,2 |
| PF01909 | Q9UGP5 | 3hwt | A | 415 | -111,3 | -140,4 |
| PF01909 | Q9UGP5 | 2bcr | A | 415 | -114,6 | -136,9 |
| PF01909 | Q9UGP5 | 3hw8 | A | 415 | -101,1 | -136,6 |
| PF01909 | Q9UGP5 | 3mdc | A | 415 | -113,6 | -143,1 |
| PF01909 | Q9UGP5 | 1xsl | A | 415 | -106,4 | -131,5 |
| PF00384 | P81186 | 2nap | A | 307 | -139,2 | -135,9 |
| PF00384 | P81186 | 2jio | A | 307 | -141,2 | -125,8 |
| PF00384 | P81186 | 2jip | A | 307 | -143,5 | -125,1 |
| PF00384 | P81186 | 2jim | A | 307 | -148,7 | -130,8 |
| PF00384 | P81186 | 2v45 | A | 307 | -139,7 | -127,3 |
| PF00384 | P81186 | 2v3v | A | 307 | -144,6 | -121,4 |
| PF00384 | P81186 | 2jir | A | 307 | -138,8 | -126,1 |
| PF00384 | P81186 | 2jiq | A | 307 | -137   | -126,6 |
| PF02574 | Q93088 | 1lt8 | A | 299 | -123,9 | -144,2 |
| PF02574 | Q9WYA5 | 1q85 | B | 272 | -114,3 | -149,8 |
| PF02574 | Q9WYA5 | 1q7z | B | 272 | -108,5 | -125,4 |
| PF02574 | Q9WYA5 | 1q85 | A | 272 | -111,7 | -140,1 |
| PF02574 | Q9WYA5 | 3bol | A | 272 | -111,8 | -148,7 |
| PF02574 | Q9WYA5 | 1q7z | A | 272 | -111   | -128,5 |
| PF07722 | Q92820 | 1l9x | B | 110 | 53,3   | -101   |
| PF07722 | Q92820 | 1l9x | D | 110 | 54,5   | -96,6  |
| PF07722 | Q92820 | 1l9x | C | 110 | 54,5   | -102,7 |
| PF07722 | Q92820 | 1l9x | A | 110 | 51,9   | -100   |
| PF07722 | Q92AL3 | 3fij | F | 115 | 47,4   | -108,7 |
| PF07722 | Q92AL3 | 3fij | E | 115 | 49     | -109,2 |
| PF07722 | Q92AL3 | 3fij | G | 115 | 45,2   | -110,3 |
| PF07722 | Q92AL3 | 3fij | C | 115 | 57,6   | -117,6 |
| PF07722 | Q92AL3 | 3fij | A | 115 | 50     | -115,6 |
| PF07722 | Q92AL3 | 3fij | D | 115 | 58,4   | -124   |
| PF07722 | Q92AL3 | 3fij | H | 115 | 45,5   | -109,9 |
| PF07722 | Q92AL3 | 3fij | B | 115 | 55,3   | -118,1 |
| PF12695 | Q01609 | 2hdw | A | 179 | 52,7   | -128,2 |
| PF12695 | Q01609 | 2hdw | B | 179 | 48     | -128   |
| PF12850 | Q9QZ88 | 1z2w | A | 41  | 82,2   | -140   |
| PF00857 | Q82NB5 | 3kl2 | D | 180 | -122,9 | -90    |
| PF00857 | Q82NB5 | 3kl2 | B | 180 | -112,4 | -100,3 |
| PF00857 | Q82NB5 | 3kl2 | F | 180 | -122,3 | -104,2 |
| PF00857 | Q82NB5 | 3kl2 | L | 180 | -113,2 | -92,1  |
| PF00857 | Q82NB5 | 3kl2 | H | 180 | -116,7 | -94,6  |
| PF00857 | Q82NB5 | 3kl2 | A | 180 | -113,4 | -101,9 |
| PF00857 | Q82NB5 | 3kl2 | G | 180 | -115,6 | -96,2  |
| PF00857 | Q82NB5 | 3kl2 | E | 180 | -116,3 | -95,2  |
| PF00857 | Q82NB5 | 3kl2 | K | 180 | -125,5 | -92,7  |
| PF00142 | P00459 | 1g20 | E | 151 | -143,6 | -149,5 |
| PF02979 | O66188 | 2dd4 | L | 131 | -172,3 | -122,6 |
| PF02979 | O66188 | 2dd4 | I | 131 | -171   | -121,2 |

Table S2

|         |        |      |   |     |        |        |
|---------|--------|------|---|-----|--------|--------|
| PF02979 | O66188 | 2dd4 | F | 131 | -174,2 | -123,4 |
| PF02979 | O66188 | 2dd4 | C | 131 | -173,1 | -120,1 |
| PF00162 | P00560 | 3pgk | A | 97  | -130,2 | -99    |
| PF01329 | P61459 | 1dco | G | 82  | -95,8  | -91,1  |
| PF02550 | Q9RM86 | 3gk7 | B | 32  | 57,7   | -113,9 |
| PF02550 | Q9RM86 | 3gk7 | A | 32  | 52,4   | -115,1 |
| PF04204 | Q72X44 | 2ghr | A | 142 | 44,8   | -116,9 |
| PF04204 | Q72X44 | 2vdj | A | 142 | 47,7   | -112,8 |
| PF02826 | P60802 | 3oet | G | 207 | -101,9 | -90,4  |
| PF03372 | P00639 | 2a42 | B | 173 | 60,7   | -129,7 |
| PF03372 | P00639 | 2dnj | A | 173 | 49,9   | -128,8 |
| PF03372 | P00639 | 1dnk | A | 173 | 44,9   | -125   |
| PF01738 | A6TGL0 | 3f67 | A | 120 | 65,3   | -118,9 |
| PF11486 | O34626 | 2euc | A | 29  | -70,9  | -120,8 |
| PF11486 | O34626 | 2euc | B | 29  | -70,4  | -121,5 |
| PF00680 | P12916 | 1xr6 | A | 289 | -161,3 | -137,3 |
| PF01008 | Q5JFM9 | 3a11 | B | 133 | 55,8   | -149,6 |
| PF01008 | Q5JFM9 | 3a11 | D | 133 | 56,3   | -150   |
| PF02774 | P44801 | 1oza | A | 136 | 42,8   | -138,4 |
| PF02776 | P0CH62 | 2pgn | B | 77  | -8     | -91,4  |
| PF01083 | P00590 | 1cuj | A | 120 | 54,6   | -123   |
| PF04273 | A4Y1H6 | 3gxx | A | 125 | -145,5 | -137,7 |
| PF04273 | A4Y1H6 | 3gxx | C | 125 | -145,6 | -135,9 |
| PF04273 | A4Y1H6 | 3gxx | B | 125 | -146   | -137,9 |
| PF04273 | A4Y1H6 | 3gxx | B | 125 | -143,5 | -135,4 |
| PF04273 | A4Y1H6 | 3gxx | A | 125 | -146,9 | -137,5 |
| PF04273 | A4Y1H6 | 3gxx | D | 125 | -144,5 | -135,9 |
| PF13354 | A8DS27 | 3dw0 | B | 69  | 47,2   | -144,5 |
| PF13354 | A8DS27 | 3c5a | A | 69  | 51,4   | -146   |
| PF13354 | A8DS27 | 3dw0 | A | 69  | 46,1   | -142,5 |
| PF13354 | P0C5C1 | 3n6i | A | 83  | 43,8   | -144,2 |
| PF13354 | P0C5C1 | 3m6b | A | 83  | 46,3   | -139,7 |
| PF13354 | P0C5C1 | 3dwz | A | 83  | 39,8   | -139,9 |
| PF13354 | P0C5C1 | 3n8r | A | 83  | 44,6   | -141,7 |
| PF13354 | P0C5C1 | 3n7w | A | 83  | 45,4   | -146,7 |
| PF13354 | P0C5C1 | 3cg5 | A | 83  | 44     | -133,2 |
| PF13354 | P0C5C1 | 3ndg | A | 83  | 47,3   | -147,2 |
| PF13354 | P0C5C1 | 3n8l | A | 83  | 44,7   | -143,3 |
| PF13354 | P0C5C1 | 3nbl | A | 83  | 46,6   | -142,2 |
| PF13354 | P0C5C1 | 3iqa | A | 83  | 46,6   | -145,1 |
| PF13354 | P0C5C1 | 3ny4 | A | 83  | 45,8   | -144,1 |
| PF13354 | P0C5C1 | 3m6h | A | 83  | 42,6   | -140,4 |
| PF13354 | P0C5C1 | 3nde | A | 83  | 45,6   | -144,5 |
| PF13354 | P0C5C1 | 3nc8 | A | 83  | 44     | -140   |
| PF13354 | P0C5C1 | 3n8s | A | 83  | 47,5   | -143,6 |
| PF13354 | P22391 | 3byd | A | 72  | 51,4   | -139,3 |
| PF13354 | Q47066 | 2zqc | A | 69  | 49,3   | -139,7 |
| PF13354 | Q47066 | 2xqz | A | 69  | 56,4   | -135,7 |
| PF13354 | Q47066 | 2wyx | A | 69  | 54,1   | -148,8 |
| PF13354 | Q47066 | 1we4 | A | 69  | 57,2   | -142,8 |
| PF13354 | Q47066 | 2zqa | A | 69  | 51,1   | -141,2 |
| PF13354 | Q47066 | 2zq8 | A | 69  | 51,7   | -139,3 |
| PF13354 | Q47066 | 1iyo | A | 69  | 57,1   | -143,2 |
| PF13354 | Q47066 | 2xr0 | A | 69  | 49,6   | -137,4 |

Table S2

|         |        |      |   |    |      |        |
|---------|--------|------|---|----|------|--------|
| PF13354 | Q47066 | 2zqd | A | 69 | 49,4 | -140   |
| PF13354 | Q47066 | 1bza | A | 69 | 56,3 | -135   |
| PF13354 | Q47066 | 2zq9 | A | 69 | 50,5 | -140,3 |
| PF13354 | Q47066 | 2zq7 | A | 69 | 52,4 | -144,2 |
| PF13354 | Q47066 | 1iyq | A | 69 | 56,7 | -145,3 |
| PF13354 | Q47066 | 1iyp | A | 69 | 60,6 | -141,4 |
| PF13354 | Q47066 | 1iys | A | 69 | 54,3 | -141,5 |
| PF13354 | Q5NH60 | 3p09 | A | 60 | 55   | -145,8 |
| PF13354 | Q5NH60 | 3p09 | B | 60 | 55,5 | -145   |
| PF13354 | Q840M4 | 1ylp | A | 69 | 46   | -134,8 |
| PF13354 | Q939N4 | 1ylw | A | 69 | 58   | -140,8 |
| PF13354 | Q93F76 | 3nia | A | 63 | 37,9 | -134,7 |
| PF13354 | Q93F76 | 3ni9 | A | 63 | 52,8 | -146   |
| PF13354 | Q93F76 | 3ni9 | B | 63 | 46,9 | -138,3 |
| PF13354 | Q93LQ9 | 2ov5 | B | 69 | 51,7 | -136   |
| PF13354 | Q93LQ9 | 3e2k | A | 69 | 49,2 | -144,3 |
| PF13354 | Q93LQ9 | 3e2k | B | 69 | 54,6 | -142,2 |
| PF13354 | Q93LQ9 | 2ov5 | A | 69 | 54,1 | -134,9 |
| PF13354 | Q93LQ9 | 2ov5 | C | 69 | 47,3 | -141,3 |
| PF13354 | Q93PQ0 | 3bfe | A | 69 | 60,5 | -135,8 |
| PF13354 | Q93PQ0 | 3bff | C | 69 | 55,5 | -137,4 |
| PF13354 | Q93PQ0 | 3bff | D | 69 | 52,6 | -138   |
| PF13354 | Q93PQ0 | 3bfg | C | 69 | 53,1 | -138,1 |
| PF13354 | Q93PQ0 | 3bfg | A | 69 | 53,7 | -139,9 |
| PF13354 | Q93PQ0 | 3bfd | C | 69 | 54,5 | -142,8 |
| PF13354 | Q93PQ0 | 3bfc | C | 69 | 53   | -137,4 |
| PF13354 | Q93PQ0 | 3bff | A | 69 | 56,5 | -137,1 |
| PF13354 | Q93PQ0 | 3bfe | C | 69 | 63,2 | -132   |
| PF13354 | Q93PQ0 | 3bfd | D | 69 | 54,2 | -142,6 |
| PF13354 | Q93PQ0 | 3bfd | B | 69 | 54,3 | -141,4 |
| PF13354 | Q93PQ0 | 3bfc | A | 69 | 34,4 | -126,1 |
| PF13354 | Q93PQ0 | 3bff | B | 69 | 55,7 | -137,3 |
| PF13354 | Q93PQ0 | 3bfe | D | 69 | 59,8 | -135,5 |
| PF13354 | Q93PQ0 | 3bfc | D | 69 | 52,6 | -136,8 |
| PF13354 | Q93PQ0 | 3bfc | B | 69 | 55,6 | -137,8 |
| PF13354 | Q93PQ0 | 3bfg | D | 69 | 53,1 | -140,6 |
| PF13354 | Q93PQ0 | 3bfd | A | 69 | 55,6 | -140,9 |
| PF13354 | Q93PQ0 | 3bfe | B | 69 | 61,4 | -131,5 |
| PF13354 | Q93PQ0 | 3bfg | B | 69 | 55,9 | -139,5 |
| PF13354 | Q9KJY7 | 2qpn | A | 63 | 55,4 | -144   |
| PF13354 | Q9KJY7 | 2qpn | B | 63 | 53,2 | -148,7 |
| PF13354 | Q9L5C7 | 1ylz | A | 69 | 47   | -140,2 |
| PF13354 | Q9L5C7 | 1ylt | A | 69 | 46,6 | -136,8 |
| PF13354 | Q9L5C7 | 1ylz | B | 69 | 46,2 | -139,8 |
| PF13354 | Q9L5C7 | 1yly | B | 69 | 47,7 | -139,6 |
| PF13354 | Q9L5C7 | 1yly | A | 69 | 45,8 | -139,2 |
| PF13354 | Q9L5C8 | 3g2z | A | 69 | 48,8 | -139,9 |
| PF13354 | Q9L5C8 | 3q07 | B | 69 | 50,8 | -137,7 |
| PF13354 | Q9L5C8 | 1ymx | B | 69 | 51,7 | -142,9 |
| PF13354 | Q9L5C8 | 2p74 | B | 69 | 50,9 | -141   |
| PF13354 | Q9L5C8 | 2p74 | A | 69 | 50,8 | -140,4 |
| PF13354 | Q9L5C8 | 3q1f | A | 69 | 49,7 | -138,3 |
| PF13354 | Q9L5C8 | 3g2y | B | 69 | 49,3 | -138,9 |
| PF13354 | Q9L5C8 | 3g35 | B | 69 | 46,9 | -140,8 |

Table S2

|         |        |      |   |     |        |        |
|---------|--------|------|---|-----|--------|--------|
| PF13354 | Q9L5C8 | 3q1f | B | 69  | 48,4   | -137,3 |
| PF13354 | Q9L5C8 | 3huo | A | 69  | 50,7   | -140,7 |
| PF13354 | Q9L5C8 | 3g34 | B | 69  | 50     | -139,6 |
| PF13354 | Q9L5C8 | 1ym1 | B | 69  | 48,5   | -137,9 |
| PF13354 | Q9L5C8 | 3hre | A | 69  | 54,3   | -139,8 |
| PF13354 | Q9L5C8 | 3hlw | A | 69  | 49,8   | -136,8 |
| PF13354 | Q9L5C8 | 1ym1 | A | 69  | 47,8   | -139,3 |
| PF13354 | Q9L5C8 | 3g35 | A | 69  | 45,9   | -140,9 |
| PF13354 | Q9L5C8 | 3g2z | B | 69  | 48,5   | -140,9 |
| PF13354 | Q9L5C8 | 3g34 | A | 69  | 47,8   | -139   |
| PF13354 | Q9L5C8 | 1ymx | A | 69  | 50,7   | -139,7 |
| PF13354 | Q9L5C8 | 1yms | B | 69  | 52,1   | -142,3 |
| PF13354 | Q9L5C8 | 3huo | B | 69  | 49,7   | -140,2 |
| PF13354 | Q9L5C8 | 3q07 | A | 69  | 51,3   | -134,8 |
| PF13354 | Q9L5C8 | 1yms | A | 69  | 55,2   | -141,5 |
| PF13354 | Q9L5C8 | 3hlw | B | 69  | 48,3   | -137,6 |
| PF13354 | Q9L5C8 | 3g2y | A | 69  | 49,1   | -138,6 |
| PF13354 | Q9L5C8 | 3g31 | B | 69  | 49,8   | -139,8 |
| PF13354 | Q9L5C8 | 3hvf | B | 69  | 49,8   | -140,3 |
| PF13354 | Q9L5C8 | 3hvf | A | 69  | 50,5   | -139,9 |
| PF13354 | Q9L5C8 | 3hre | B | 69  | 53,3   | -140,4 |
| PF13354 | Q9L5C8 | 3g32 | A | 69  | 48,9   | -139,2 |
| PF13354 | Q9L5C8 | 3g30 | A | 69  | 50,1   | -138,8 |
| PF13354 | Q9L5C8 | 1ylj | A | 69  | 49,8   | -139,1 |
| PF13354 | Q9L5C8 | 3g31 | A | 69  | 46,9   | -136,8 |
| PF13354 | Q9L5C8 | 3g32 | B | 69  | 48,7   | -139,6 |
| PF13354 | Q9RBQ1 | 1o7e | B | 69  | 49,8   | -141,1 |
| PF13354 | Q9RBQ1 | 1n4o | B | 69  | 46,9   | -142,6 |
| PF13354 | Q9RBQ1 | 1o7e | A | 69  | 48,9   | -143,5 |
| PF13354 | Q9RBQ1 | 1o7e | B | 220 | -100,9 | -128,9 |
| PF13354 | Q9RBQ1 | 1n4o | B | 220 | -104,3 | -127,4 |
| PF13354 | Q9RBQ1 | 1n4o | A | 69  | 49,7   | -142,9 |
| PF13354 | Q9RBQ1 | 1o7e | A | 220 | -101,9 | -130,1 |
| PF13354 | Q9RBQ1 | 1n4o | A | 220 | -99,7  | -127,8 |
| PF00077 | Q7SPG9 | 2fdd | B | 67  | 63     | -113,2 |
| PF00077 | O38732 | 2nxl | A | 67  | 55,8   | -124,1 |
| PF00077 | P03366 | 1mes | A | 67  | 51,6   | -137,6 |
| PF00077 | P03366 | 1mes | B | 67  | 47,5   | -132,6 |
| PF00077 | P03366 | 1mer | A | 67  | 54,3   | -137   |
| PF00077 | P03366 | 1met | B | 67  | 45,2   | -141,6 |
| PF00077 | P03366 | 1met | A | 67  | 53,6   | -138,8 |
| PF00077 | P03366 | 1meu | B | 67  | 44,5   | -148,3 |
| PF00077 | P03367 | 1zj7 | A | 67  | 56     | -125,6 |
| PF00077 | P03369 | 3em3 | A | 67  | 60,4   | -128,5 |
| PF00077 | P04585 | 1bv9 | B | 67  | 46,8   | -128,4 |
| PF00077 | P04585 | 1bv7 | A | 67  | 55,4   | -130,9 |
| PF00077 | P04585 | 1bwb | B | 67  | 48,6   | -137,8 |
| PF00077 | P04585 | 1bv7 | B | 67  | 51,2   | -137,7 |
| PF00077 | P04585 | 1qbu | B | 67  | 53,3   | -97,5  |
| PF00077 | P04585 | 1bwa | B | 67  | 49,4   | -137,9 |
| PF00077 | P04585 | 1qbu | A | 67  | 64,4   | -103,9 |
| PF00077 | P04585 | 1qbr | B | 67  | 50,9   | -140,9 |
| PF00077 | P04585 | 1hvh | B | 67  | 50,7   | -135,5 |
| PF00077 | P04585 | 3kt5 | A | 67  | 55,4   | -135   |

Table S2

|         |        |      |   |     |        |        |
|---------|--------|------|---|-----|--------|--------|
| PF00077 | P04587 | 1hqv | A | 67  | 63,5   | -129,5 |
| PF00077 | Q993Q5 | 3u7s | B | 67  | 57,2   | -121,4 |
| PF00077 | Q9WEZ1 | 3ixo | A | 67  | 61,9   | -128,3 |
| PF00795 | D0VWZ1 | 3hkv | A | 165 | 41     | -116,4 |
| PF00795 | O58376 | 1j31 | D | 146 | 36,1   | -114   |
| PF00795 | O58376 | 1j31 | C | 146 | 38,4   | -115   |
| PF00795 | O58376 | 1j31 | A | 146 | 39,2   | -117,3 |
| PF00795 | O58376 | 1j31 | B | 146 | 35,7   | -115,7 |
| PF00795 | P0A5L6 | 3dla | B | 176 | 34,8   | -95,5  |
| PF00795 | P0A5L6 | 3dla | D | 176 | 32,7   | -94,8  |
| PF00795 | P0A5L6 | 3dla | C | 176 | 32,2   | -96,2  |
| PF00795 | P0A5L6 | 3dla | A | 176 | 33     | -106,4 |
| PF00795 | Q5HEG7 | 3p8k | B | 146 | 33,9   | -103,1 |
| PF00795 | Q5HEG7 | 3p8k | A | 146 | 35,1   | -101,3 |
| PF00795 | Q9JHW2 | 2w1v | A | 191 | 41,9   | -103   |
| PF00795 | Q9JHW2 | 2w1v | B | 191 | 44,3   | -102,7 |
| PF00235 | P35080 | 1d1j | C | 25  | -109,2 | -111,6 |
| PF00235 | P35080 | 1d1j | B | 25  | -101   | -108,7 |
| PF00235 | P35080 | 1d1j | A | 25  | -119,9 | -100,7 |
| PF00235 | P35080 | 1d1j | D | 25  | -109,9 | -107,5 |
| PF00235 | Q3V171 | 2v8f | A | 25  | -105,7 | -108,8 |
| PF00235 | Q3V171 | 2v8f | B | 25  | -113,3 | -108,9 |
| PF00235 | Q9EPC6 | 2vk3 | A | 25  | -117,6 | -108,7 |
| PF00069 | P53779 | 3da6 | A | 117 | -44,3  | -94,3  |
| PF00069 | P63086 | 2fys | B | 252 | -62,9  | -148,3 |
| PF00069 | Q16539 | 3ctq | A | 119 | -75,9  | -114,1 |
| PF01058 | F2Z6J5 | 3ayx | B | 126 | 49,2   | -149,8 |
| PF01058 | F2Z6J5 | 3ayy | D | 126 | 47,1   | -147   |
| PF01058 | P31892 | 3rgw | S | 120 | 48,6   | -148,2 |
| PF01451 | P45947 | 1z2e | A | 15  | -134,3 | -93,8  |
| PF01451 | Q5SJ34 | 2cwg | B | 16  | -121,7 | -90    |
| PF01134 | O66962 | 2zxi | C | 48  | -123,3 | -127,2 |
| PF01134 | O66962 | 2zxi | B | 48  | -123   | -128,1 |
| PF01134 | O66962 | 2zxi | D | 48  | -119,2 | -123,2 |
| PF01134 | O66962 | 2zxi | A | 48  | -119,8 | -123,6 |
| PF01134 | P0A6U3 | 3ces | A | 47  | -119,2 | -132,7 |
| PF01134 | P0A6U3 | 3ces | D | 47  | -103,7 | -120,1 |
| PF01134 | P0A6U3 | 3ces | B | 47  | -111,9 | -131,4 |
| PF01134 | P0A6U3 | 3ces | C | 47  | -114,8 | -135,3 |
| PF01301 | P16278 | 3thc | B | 127 | 66,2   | -101,8 |
| PF01301 | P16278 | 3thd | B | 127 | 63,3   | -99,7  |
| PF01301 | P16278 | 3thc | A | 127 | 62,6   | -104,9 |
| PF01301 | P16278 | 3thd | D | 127 | 67,3   | -106   |
| PF01301 | P16278 | 3thc | D | 127 | 69,6   | -104,7 |
| PF01301 | P16278 | 3thc | C | 127 | 66,5   | -108,1 |
| PF01301 | P16278 | 3thd | C | 127 | 64,7   | -103,2 |
| PF01301 | P16278 | 3thd | A | 127 | 64,1   | -102,7 |
| PF01301 | Q8AB22 | 3d3a | A | 121 | 65,2   | -98,1  |
| PF00104 | P03372 | 2iog | A | 530 | 80     | -147,1 |
| PF00104 | P03372 | 1yim | A | 530 | -112,9 | -126,9 |
| PF00104 | P03372 | 1xp1 | A | 530 | 26,2   | -91    |
| PF00104 | P15207 | 1i37 | A | 844 | -178,6 | -115,3 |
| PF11550 | Q5NEC5 | 2qwu | A | 194 | -97    | -132,9 |
| PF11550 | Q5NEC5 | 2qwu | B | 194 | -95,1  | -135,3 |

Table S2

|         |        |      |   |      |        |        |
|---------|--------|------|---|------|--------|--------|
| PF12160 | P02672 | 2baf | A | 51   | 50,8   | -100,7 |
| PF01327 | P0A6K3 | 2def | A | 90   | -92,5  | -124,2 |
| PF02146 | O28597 | 1m2k | A | 148  | -123,8 | -142,2 |
| PF00320 | P17429 | 4gat | A | 33   | -85,7  | -145,5 |
| PF00320 | P17429 | 5gat | A | 33   | -86,9  | -138,9 |
| PF01432 | P52888 | 2o36 | A | 350  | 64,6   | -110,2 |
| PF01536 | P17707 | 3dz5 | A | 82   | -135,6 | -142,1 |
| PF00240 | Q9BZL1 | 1p0r | A | 18   | -146   | -149,5 |
| PF13894 | O35615 | 1srk | A | 13   | -95,2  | -128,5 |
| PF13419 | O31156 | 2iof | A | 22   | 70,1   | -104,1 |
| PF02033 | P75589 | 1pa4 | A | 53   | -71,1  | -148,7 |
| PF10013 | Q5SHP9 | 3kit | Y | 79   | -120,7 | -148,2 |
| PF00443 | Q93009 | 1nb8 | B | 223  | 51,3   | -104,5 |
| PF00443 | Q93009 | 1nb8 | A | 223  | 65,1   | -120,9 |
| PF00443 | Q93009 | 1nbf | E | 223  | 58,6   | -110,2 |
| PF13499 | P79880 | 2r2i | A | 124  | -34,8  | -102,1 |
| PF01123 | Q5HHK0 | 3ea6 | A | 73   | 47,9   | -114,2 |
| PF02810 | Q4FPZ7 | 2i9w | A | 28   | -130,8 | -94,3  |
| PF02733 | Q9CIW0 | 2iu6 | B | 298  | 43,5   | -120,4 |
| PF02733 | Q9CIW0 | 2iu4 | A | 298  | 45,7   | -123,9 |
| PF02733 | Q9CIW0 | 2iu4 | B | 298  | 43,7   | -126,6 |
| PF03718 | P48845 | 1ogo | X | 415  | -87,9  | -105,3 |
| PF03718 | P48845 | 1ogm | X | 415  | -89,5  | -104,9 |
| PF00133 | P56690 | 1jzs | A | 464  | -86,2  | -114,7 |
| PF00254 | Q14318 | 2awg | A | 178  | -115,5 | -119,5 |
| PF00254 | Q14318 | 3ey6 | A | 121  | -117,8 | -112,9 |
| PF00180 | O14104 | 3ty3 | B | 131  | 63,7   | -141,4 |
| PF00180 | O14104 | 3ty3 | A | 131  | 66,9   | -142,2 |
| PF00180 | O14104 | 3ty4 | A | 131  | 62,4   | -140,8 |
| PF00180 | O14104 | 3ty4 | B | 131  | 60,1   | -142,3 |
| PF00498 | P66799 | 2fez | A | 372  | 53,2   | -114,3 |
| PF00498 | P66799 | 2ff4 | A | 372  | 56     | -113,5 |
| PF03331 | D5CV28 | 3ps1 | A | 63   | 60,2   | -141,2 |
| PF03331 | D5CV28 | 3ps2 | A | 63   | 56,9   | -145,3 |
| PF03331 | D5CV28 | 3p3g | A | 63   | 61,1   | -146,5 |
| PF03331 | D5CV28 | 3ps3 | A | 63   | 58,9   | -142,8 |
| PF03643 | Q8C0E2 | 3lh9 | A | 171  | -106,8 | -102,4 |
| PF13465 | P25490 | 1ubd | C | 360  | -86,3  | -90,3  |
| PF00403 | O32220 | 1opz | A | 17   | 51,3   | -136,3 |
| PF01636 | P0A3Y5 | 3tm0 | A | 156  | 65,6   | -113,4 |
| PF02597 | O32583 | 1zud | 2 | 12   | -124,3 | -97,6  |
| PF10431 | P43773 | 1ofh | A | 263  | -106,8 | -144,9 |
| PF02217 | P03070 | 2ntc | A | 216  | -58,5  | -149,4 |
| PF04879 | Q56223 | 3iam | C | 263  | -67,2  | -146   |
| PF04879 | Q56223 | 3iam | 3 | 263  | -67,2  | -143,4 |
| PF01780 | P60619 | 1vq9 | Z | 42   | -100,8 | -148,7 |
| PF01780 | P60619 | 1yhq | Z | 42   | -75    | -128,7 |
| PF01780 | P60619 | 1vqo | Z | 42   | -85,3  | -140,5 |
| PF01780 | P60619 | 1vqk | Z | 42   | -85,8  | -138,7 |
| PF01780 | P60619 | 1vqm | Z | 42   | 172,8  | -135,6 |
| PF01780 | P60619 | 1vql | Z | 42   | 175,6  | -136,7 |
| PF01780 | P60619 | 1vqp | Z | 42   | -91,2  | -107,7 |
| PF01780 | P60619 | 3cc2 | Z | 66   | -80    | -125,2 |
| PF00793 | P0A715 | 1phw | A | 1249 | -140,9 | -112,8 |

Table S2

|         |        |      |   |     |        |        |
|---------|--------|------|---|-----|--------|--------|
| PF00018 | P62993 | 1gfd | A | 42  | -145   | -94,3  |
| PF00076 | Q9Y3B4 | 2f9d | B | 83  | 47,5   | -145,3 |
| PF00079 | P05543 | 2riw | A | 66  | 51     | -137,7 |
| PF00079 | P05543 | 2xn3 | A | 66  | 55,8   | -133,6 |
| PF00079 | P05543 | 2riv | A | 66  | 49,7   | -139,9 |
| PF03114 | Q62420 | 1zww | A | 108 | -114,7 | -104,7 |
| PF06393 | P70444 | 1ddb | A | 30  | -56,1  | -110   |
| PF04135 | Q8U1R4 | 2ey4 | F | 23  | -74,8  | -145,9 |
| PF00144 | Q9ZBA9 | 1ei5 | A | 61  | 48,8   | -124,6 |
| PF02458 | A4PHY4 | 2e1u | A | 421 | -82,6  | -90,8  |
| PF02458 | A4PHY4 | 2e1u | B | 421 | -81,6  | -113,2 |
| PF00579 | P00951 | 1wq3 | A | 116 | -146,7 | -149,4 |
| PF02745 | P11558 | 3m32 | A | 218 | -114   | -124,7 |
| PF02745 | P11558 | 1mro | A | 218 | -113,7 | -126,8 |
| PF02745 | P11558 | 3m1v | A | 218 | -111,4 | -126,9 |
| PF02745 | P11558 | 3m30 | D | 218 | -108,2 | -123,1 |
| PF02745 | P11558 | 1hbm | D | 218 | -113,9 | -123,4 |
| PF02745 | P11558 | 1hbo | D | 218 | -109,8 | -122,9 |
| PF02745 | P11558 | 3m1v | D | 218 | -109,6 | -127,6 |
| PF02745 | P11558 | 3pot | D | 218 | -112,4 | -126,5 |
| PF02745 | P11558 | 1hbn | D | 218 | -112,6 | -124,8 |
| PF02745 | P11558 | 3m2u | D | 218 | -111,4 | -125,6 |
| PF02745 | P11558 | 3m30 | A | 218 | -114,7 | -124   |
| PF02745 | P11558 | 1hbm | A | 218 | -114   | -125,7 |
| PF02745 | P11558 | 3m2r | A | 218 | -114,5 | -126,7 |
| PF02745 | P11558 | 1mro | D | 218 | -113   | -124,9 |
| PF02745 | P11558 | 1hbo | A | 218 | -111,5 | -125,2 |
| PF02745 | P11558 | 3pot | A | 218 | -111,9 | -124,5 |
| PF02745 | P11558 | 1hbu | A | 218 | -113,1 | -123,1 |
| PF02745 | P11558 | 3m2v | D | 218 | -109,5 | -126,1 |
| PF02745 | P11558 | 1hbu | D | 218 | -108,9 | -126,5 |
| PF02745 | P11558 | 3m32 | D | 218 | -110,4 | -125,9 |
| PF02745 | P11558 | 3m2v | A | 218 | -109,8 | -124,6 |
| PF02745 | P11558 | 3m2u | A | 218 | -115,1 | -125,7 |
| PF02745 | P11558 | 3m2r | D | 218 | -109,3 | -127,3 |
| PF02745 | P11558 | 1hbn | A | 218 | -109,5 | -132,3 |
| PF00042 | P68871 | 1bij | B | 93  | -93,7  | -100,9 |
| PF07653 | Q96B97 | 2k6d | A | 301 | -64,1  | -133,5 |
| PF00680 | Q82122 | 1tp7 | A | 229 | -165,3 | -147,7 |
| PF00685 | P52839 | 2q3m | A | 155 | -65,6  | -119,1 |
| PF01474 | O53512 | 3rzi | B | 440 | -154   | -106,5 |
| PF01474 | O53512 | 2w1a | A | 440 | -151,6 | -105,6 |
| PF01474 | O53512 | 2w1a | B | 440 | -145,8 | -104,7 |
| PF01474 | O53512 | 3kgf | A | 440 | -146,6 | -118,2 |
| PF01474 | O53512 | 3rzi | A | 440 | -143,5 | -108,6 |
| PF01474 | O53512 | 3pfp | B | 440 | -154,6 | -102,1 |
| PF01474 | O53512 | 3nv8 | A | 440 | -152,2 | -110   |
| PF01474 | O53512 | 3nv8 | B | 440 | -145,9 | -104   |
| PF01926 | Q9X1F8 | 1mky | A | 57  | 47,1   | -115,3 |
| PF01641 | Q78J03 | 2l1u | A | 43  | -110   | -103,5 |
| PF12888 | P23890 | 3lya | A | 208 | -17,2  | -124,9 |
| PF00936 | B1VB78 | 3pac | A | 38  | 45     | -149,7 |
| PF00175 | P83686 | 1ndh | A | 255 | -83,2  | -149,8 |
| PF00217 | Q6AW42 | 3l2f | O | 292 | -117,1 | -146,9 |



Table S2

|         |        |      |   |      |        |        |
|---------|--------|------|---|------|--------|--------|
| PF02979 | Q7SID2 | 1ugs | A | 111  | -171,1 | -98,3  |
| PF02979 | Q7SID2 | 1ugq | A | 111  | -163,5 | -95,5  |
| PF01182 | B8E528 | 3nwp | A | 143  | 46,9   | -137,1 |
| PF01182 | B8E528 | 3nwp | B | 143  | 49,7   | -134,4 |
| PF10569 | P01024 | 3g6j | B | 988  | -99,6  | -109,7 |
| PF00696 | Q60352 | 3k56 | A | 230  | -124,1 | -147,2 |
| PF03171 | P18548 | 1w28 | A | 155  | -134   | -140,6 |
| PF03171 | P18548 | 1rxg | A | 155  | -134   | -141,3 |
| PF03171 | P18548 | 2jb8 | A | 155  | -134,8 | -141,4 |
| PF03171 | P18548 | 1uo9 | A | 155  | -131,9 | -143,9 |
| PF03171 | P18548 | 1e5h | A | 155  | -120,7 | -139,3 |
| PF03171 | P18548 | 1uob | A | 155  | -133,2 | -140,8 |
| PF03171 | P18548 | 1dcs | A | 155  | -134,5 | -140,4 |
| PF03171 | P18548 | 1e5i | A | 155  | -118,2 | -142,3 |
| PF03171 | P18548 | 1hfg | A | 155  | -122,1 | -140,8 |
| PF05592 | Q93RE7 | 2okx | A | 896  | 54,9   | -121,6 |
| PF05592 | Q93RE7 | 2okx | B | 896  | 57     | -121,5 |
| PF00596 | Q9RQ12 | 2opi | B | 25   | 53,5   | -116,2 |
| PF00596 | Q9RQ12 | 2opi | A | 25   | 47,9   | -123,5 |
| PF04909 | C8N232 | 3nur | A | 219  | -97,7  | -121,3 |
| PF08601 | P19880 | 1sse | B | 598  | -59    | -105,4 |
| PF00607 | P14077 | 1g03 | A | 63   | -107,3 | -143   |
| PF07925 | P17378 | 1n35 | A | 1064 | -124,5 | -138,2 |
| PF07925 | P17378 | 1mwh | A | 1064 | -120   | -141,4 |
| PF07925 | P17378 | 1muk | A | 1064 | -121,1 | -138,4 |
| PF04199 | Q58193 | 2b0a | A | 42   | 58,9   | -139,1 |
| PF01179 | P46881 | 3amo | B | 315  | 67,7   | -92,7  |
| PF07714 | P43403 | 1u59 | A | 346  | -157   | -144,9 |
| PF02901 | P09373 | 1h18 | A | 418  | 61     | -112,8 |
| PF02901 | P09373 | 1h18 | B | 418  | 62,6   | -106,8 |
| PF02901 | P09373 | 1h16 | A | 418  | 58,5   | -109,9 |
| PF02901 | P09373 | 1h17 | A | 418  | 61,2   | -104,4 |
| PF03372 | A7LAI8 | 3i41 | A | 122  | -120,8 | -132,6 |
| PF00516 | Q8QDX5 | 2ny4 | A | 268  | -117,8 | -99,9  |
| PF00186 | Q27793 | 3irm | A | 187  | -97,7  | -149,3 |
| PF00225 | Q02224 | 1t5c | A | 144  | -123,6 | -132,5 |
| PF00022 | P68135 | 3b5u | B | 285  | -149,6 | -146,7 |
| PF00022 | P68135 | 3b5u | F | 285  | -156,7 | -101,5 |
| PF05996 | Q58MU6 | 2vgr | D | 159  | -136,5 | -126,7 |
| PF00027 | P00516 | 3shr | B | 174  | -71,6  | -114,5 |
| PF03063 | Q9F8A8 | 3b51 | X | 201  | -116   | -121,2 |
| PF03063 | Q9F8A8 | 1su7 | A | 201  | -111,2 | -124   |
| PF03063 | Q9F8A8 | 1suf | A | 201  | -112   | -123,6 |
| PF03063 | Q9F8A8 | 1su6 | A | 201  | -115,2 | -122,7 |
| PF03063 | Q9F8A8 | 1su8 | A | 201  | -112,8 | -124,7 |
| PF03063 | Q9F8A8 | 3b53 | X | 201  | -115,7 | -121,5 |
| PF03063 | Q9F8A8 | 3b52 | X | 201  | -117,3 | -123,5 |
| PF03063 | Q9F8A8 | 3i39 | X | 201  | -111,4 | -122,1 |
| PF00367 | P69786 | 1o2f | B | 335  | -135,2 | -130,9 |
| PF00367 | P69786 | 3bp3 | B | 33   | -109,6 | -131,9 |
| PF00367 | P69786 | 3bp3 | A | 33   | -110   | -132   |
| PF00613 | O02697 | 1e7u | A | 524  | -68,9  | -122   |
| PF00425 | Q81QQ0 | 3os6 | C | 306  | -123,4 | -93,1  |
| PF00425 | Q81QQ0 | 3os6 | B | 306  | -125,8 | -92    |

Table S2

|         |        |      |   |     |        |       |
|---------|--------|------|---|-----|--------|-------|
| PF00425 | Q81QQ0 | 3os6 | D | 306 | -117,5 | -98,3 |
| PF00425 | Q81QQ0 | 3os6 | A | 306 | -115,5 | -96,7 |
| PF07823 | O04147 | 1jh7 | A | 86  | -89,1  | -92   |
