# Supplementary material for: Protein Topology Determines Cysteine Oxidation Fate: The Case of Sulfenyl Amide Formation among Protein Families
Source: PubMed Central journal article supplement (PMC4351059; doi:10.1371/journal.pcbi.1004051), 2015-03-05
Supplement: pcbi.1004051.s014.pdf [file pcbi.1004051.s014.pdf]

**Table S3. Proteins with cysteine in “forbidden conformation” and without the beta-loop-helix motif.**

| PFAM Family | UniProt | PDB  | Chain | ResID | Phi    | Psi    |
|-------------|---------|------|-------|-------|--------|--------|
| PF00018     | P62993  | 1gfd | A     | 42    | -145   | -94,3  |
| PF00022     | P68135  | 3b5u | B     | 285   | -149,6 | -146,7 |
| PF00027     | P00516  | 3shr | B     | 174   | -71,6  | -114,5 |
| PF00042     | P68871  | 1bij | B     | 93    | -93,7  | -100,9 |
| PF00069     | P53779  | 3da6 | A     | 117   | -44,3  | -94,3  |
| PF00069     | P63086  | 2fys | B     | 252   | -62,9  | -148,3 |
| PF00069     | Q16539  | 3ctq | A     | 119   | -75,9  | -114,1 |
| PF00076     | Q9Y3B4  | 2f9d | B     | 83    | 47,5   | -145,3 |
| PF00077     | O38732  | 2nxl | A     | 67    | 55,8   | -124,1 |
| PF00077     | P03366  | 1mes | A     | 67    | 51,6   | -137,6 |
| PF00077     | P03367  | 1zj7 | A     | 67    | 56     | -125,6 |
| PF00077     | P03369  | 3em3 | A     | 67    | 60,4   | -128,5 |
| PF00077     | P04585  | 1bv9 | B     | 67    | 46,8   | -128,4 |
| PF00077     | P04587  | 1hvp | A     | 67    | 63,5   | -129,5 |
| PF00077     | Q7SPG9  | 2fdd | B     | 67    | 63     | -113,2 |
| PF00077     | Q993Q5  | 3u7s | B     | 67    | 57,2   | -121,4 |
| PF00077     | Q9WEZ1  | 3ixo | A     | 67    | 61,9   | -128,3 |
| PF00079     | P05543  | 2riw | A     | 66    | 51     | -137,7 |
| PF00104     | P03372  | 2iog | A     | 530   | 80     | -147,1 |
| PF00104     | P15207  | 1i37 | A     | 844   | -178,6 | -115,3 |
| PF00133     | P56690  | 1jzs | A     | 464   | -86,2  | -114,7 |
| PF00144     | Q9ZBA9  | 1ei5 | A     | 61    | 48,8   | -124,6 |
| PF00175     | P83686  | 1ndh | A     | 255   | -83,2  | -149,8 |
| PF00180     | O14104  | 3ty3 | B     | 131   | 63,7   | -141,4 |
| PF00186     | Q27793  | 3irm | A     | 187   | -97,7  | -149,3 |
| PF00217     | Q6AW42  | 3l2f | O     | 292   | -117,1 | -146,9 |
| PF00225     | Q02224  | 1t5c | A     | 144   | -123,6 | -132,5 |
| PF00235     | P35080  | 1d1j | C     | 25    | -109,2 | -111,6 |
| PF00235     | Q3V171  | 2v8f | A     | 25    | -105,7 | -108,8 |
| PF00235     | Q9EPC6  | 2vk3 | A     | 25    | -117,6 | -108,7 |
| PF00240     | Q9BZL1  | 1pOr | A     | 18    | -146   | -149,5 |
| PF00254     | Q14318  | 2awg | A     | 178   | -115,5 | -119,5 |
| PF00320     | P17429  | 4gat | A     | 33    | -85,7  | -145,5 |
| PF00367     | P69786  | 1o2f | B     | 335   | -135,2 | -130,9 |
| PF00403     | O32220  | 1opz | A     | 17    | 51,3   | -136,3 |
| PF00425     | Q81QQ0  | 3os6 | C     | 306   | -123,4 | -93,1  |
| PF00443     | Q93009  | 1nb8 | B     | 223   | 51,3   | -104,5 |
| PF00498     | P66799  | 2fez | A     | 372   | 53,2   | -114,3 |
| PF00516     | Q8QDX5  | 2ny4 | A     | 268   | -117,8 | -99,9  |
| PF00579     | P00951  | 1wq3 | A     | 116   | -146,7 | -149,4 |
| PF00596     | Q9RQ12  | 2opi | B     | 25    | 53,5   | -116,2 |
| PF00607     | P14077  | 1g03 | A     | 63    | -107,3 | -143   |
| PF00613     | O02697  | 1e7u | A     | 524   | -68,9  | -122   |
| PF00680     | Q82122  | 1tp7 | A     | 229   | -165,3 | -147,7 |
| PF00685     | P52839  | 2q3m | A     | 155   | -65,6  | -119,1 |
| PF00696     | Q60352  | 3k56 | A     | 230   | -124,1 | -147,2 |
| PF00793     | P0A715  | 1phw | A     | 1249  | -140,9 | -112,8 |
| PF00795     | D0VWZ1  | 3hnx | A     | 165   | 41     | -116,4 |

Table S3

|         |        |       |   |     |        |        |
|---------|--------|-------|---|-----|--------|--------|
| PF00795 | O58376 | 1j31  | D | 146 | 36,1   | -114   |
| PF00795 | P0A5L6 | 3dla  | B | 176 | 34,8   | -95,5  |
| PF00795 | Q5HEG7 | 3p8k  | B | 146 | 33,9   | -103,1 |
| PF00795 | Q9JHW2 | 2w1v  | A | 191 | 41,9   | -103   |
| PF00936 | B1VB78 | 3pac  | A | 38  | 45     | -149,7 |
| PF01058 | F2Z6J5 | 3ayx  | B | 126 | 49,2   | -149,8 |
| PF01058 | P31892 | 3rgw  | S | 120 | 48,6   | -148,2 |
| PF01123 | Q5HHK0 | 3ea6  | A | 73  | 47,9   | -114,2 |
| PF01134 | O66962 | 2zxi  | C | 48  | -123,3 | -127,2 |
| PF01134 | P0A6U3 | 3ces  | A | 47  | -119,2 | -132,7 |
| PF01179 | P46881 | 3amo  | B | 315 | 67,7   | -92,7  |
| PF01182 | B8E528 | 3nwp  | A | 143 | 46,9   | -137,1 |
| PF01301 | P16278 | 3thc  | B | 127 | 66,2   | -101,8 |
| PF01301 | Q8AB22 | 3d3a  | A | 121 | 65,2   | -98,1  |
| PF01327 | P0A6K3 | 2def  | A | 90  | -92,5  | -124,2 |
| PF01432 | P52888 | 2o36  | A | 350 | 64,6   | -110,2 |
| PF01451 | P45947 | 1z2e  | A | 15  | -134,3 | -93,8  |
| PF01451 | Q5SJ34 | 2c wd | B | 16  | -121,7 | -90    |
| PF01474 | O53512 | 3rzi  | B | 440 | -154   | -106,5 |
| PF01536 | P17707 | 3dz5  | A | 82  | -135,6 | -142,1 |
| PF01636 | P0A3Y5 | 3tm0  | A | 156 | 65,6   | -113,4 |
| PF01641 | Q78J03 | 2l1u  | A | 43  | -110   | -103,5 |
| PF01780 | P60619 | 1vq9  | Z | 42  | -100,8 | -148,7 |
| PF01926 | Q9X1F8 | 1mky  | A | 57  | 47,1   | -115,3 |
| PF02033 | P75589 | 1pa4  | A | 53  | -71,1  | -148,7 |
| PF02146 | O28597 | 1m2k  | A | 148 | -123,8 | -142,2 |
| PF02217 | P03070 | 2ntc  | A | 216 | -58,5  | -149,4 |
| PF02458 | A4PHY4 | 2e1u  | A | 421 | -82,6  | -90,8  |
| PF02597 | O32583 | 1zud  | 2 | 12  | -124,3 | -97,6  |
| PF02733 | Q9CIW0 | 2iu6  | B | 298 | 43,5   | -120,4 |
| PF02745 | P11558 | 3m32  | A | 218 | -114   | -124,7 |
| PF02810 | Q4FPZ7 | 2i9w  | A | 28  | -130,8 | -94,3  |
| PF02901 | P09373 | 1h18  | A | 418 | 61     | -112,8 |
| PF02979 | Q7SID2 | 1ugs  | A | 111 | -171,1 | -98,3  |
| PF03063 | Q9F8A8 | 3b51  | X | 201 | -116   | -121,2 |
| PF03114 | Q62420 | 1zww  | A | 108 | -114,7 | -104,7 |
| PF03171 | P18548 | 1w28  | A | 155 | -134   | -140,6 |
| PF03331 | D5CV28 | 3ps1  | A | 63  | 60,2   | -141,2 |
| PF03372 | A7LAI8 | 3i41  | A | 122 | -120,8 | -132,6 |
| PF03643 | Q8C0E2 | 3lh9  | A | 171 | -106,8 | -102,4 |
| PF03718 | P48845 | 1ogo  | X | 415 | -87,9  | -105,3 |
| PF04135 | Q8U1R4 | 2ey4  | F | 23  | -74,8  | -145,9 |
| PF04199 | Q58193 | 2b0a  | A | 42  | 58,9   | -139,1 |
| PF04879 | Q56223 | 3iam  | C | 263 | -67,2  | -146   |
| PF04909 | C8N232 | 3nur  | A | 219 | -97,7  | -121,3 |
| PF05592 | Q93RE7 | 2okx  | A | 896 | 54,9   | -121,6 |
| PF05996 | Q58MU6 | 2vgr  | D | 159 | -136,5 | -126,7 |
| PF06393 | P70444 | 1ddb  | A | 30  | -56,1  | -110   |
| PF07653 | Q96B97 | 2k6d  | A | 301 | -64,1  | -133,5 |
| PF07714 | P43403 | 1u59  | A | 346 | -157   | -144,9 |
| PF07823 | O04147 | 1jh7  | A | 86  | -89,1  | -92    |

Table S3

|         |        |      |   |      |        |        |
|---------|--------|------|---|------|--------|--------|
| PF07925 | P17378 | 1n35 | A | 1064 | -124,5 | -138,2 |
| PF08601 | P19880 | 1sse | B | 598  | -59    | -105,4 |
| PF10013 | Q5SHP9 | 3kit | Y | 79   | -120,7 | -148,2 |
| PF10431 | P43773 | 1ofh | A | 263  | -106,8 | -144,9 |
| PF10569 | P01024 | 3g6j | B | 988  | -99,6  | -109,7 |
| PF11550 | Q5NEC5 | 2qwu | A | 194  | -97    | -132,9 |
| PF12160 | P02672 | 2baf | A | 51   | 50,8   | -100,7 |
| PF12888 | P23890 | 3lya | A | 208  | -17,2  | -124,9 |
| PF13354 | A8DS27 | 3dw0 | B | 69   | 47,2   | -144,5 |
| PF13354 | P0C5C1 | 3n6i | A | 83   | 43,8   | -144,2 |
| PF13354 | P22391 | 3byd | A | 72   | 51,4   | -139,3 |
| PF13354 | Q47066 | 2zqc | A | 69   | 49,3   | -139,7 |
| PF13354 | Q5NH60 | 3p09 | A | 60   | 55     | -145,8 |
| PF13354 | Q840M4 | 1ylp | A | 69   | 46     | -134,8 |
| PF13354 | Q939N4 | 1ylw | A | 69   | 58     | -140,8 |
| PF13354 | Q93F76 | 3nia | A | 63   | 37,9   | -134,7 |
| PF13354 | Q93LQ9 | 2ov5 | B | 69   | 51,7   | -136   |
| PF13354 | Q93PQ0 | 3bfe | A | 69   | 60,5   | -135,8 |
| PF13354 | Q9KJY7 | 2qpn | A | 63   | 55,4   | -144   |
| PF13354 | Q9L5C7 | 1ylz | A | 69   | 47     | -140,2 |
| PF13354 | Q9L5C8 | 3g2z | A | 69   | 48,8   | -139,9 |
| PF13354 | Q9RBQ1 | 1o7e | B | 69   | 49,8   | -141,1 |
| PF13419 | O31156 | 2iof | A | 22   | 70,1   | -104,1 |
| PF13465 | P25490 | 1ubd | C | 360  | -86,3  | -90,3  |
| PF13499 | P79880 | 2r2i | A | 124  | -34,8  | -102,1 |
| PF13894 | O35615 | 1srk | A | 13   | -95,2  | -128,5 |
