# Supplementary material for: Protein Topology Determines Cysteine Oxidation Fate: The Case of Sulfenyl Amide Formation among Protein Families
Source: PubMed Central journal article supplement (PMC4351059; doi:10.1371/journal.pcbi.1004051), 2015-03-05
Supplement: pcbi.1004051.s015.pdf [file pcbi.1004051.s015.pdf]

Table S4

**Table S4. Proteins in the PDB in forbidden conformation Cys with the beta-loop-helix motif.**

| PFAM Family | UniProt | PDB  | Chain | ResID | Phi    | Psi    |
|-------------|---------|------|-------|-------|--------|--------|
| PF00102     | A3QMF6  | 3f41 | B     | 250   | -128,2 | -124,5 |
| PF00102     | M0R726  | 2nv5 | C     | 1424  | -132,5 | -121,7 |
| PF00102     | O14522  | 2ooq | A     | 1106  | -129,4 | -122,9 |
| PF00102     | O68720  | 1qz0 | A     | 403   | -124,5 | -118,4 |
| PF00102     | P10586  | 1lar | A     | 1813  | -140   | -124,2 |
| PF00102     | P15273  | 1xxv | A     | 403   | -117,7 | -114,1 |
| PF00102     | P18031  | 2zmm | A     | 215   | -122,1 | -129,8 |
| PF00102     | P18052  | 1p15 | B     | 724   | -134,4 | -97,3  |
| PF00102     | P23467  | 2i4g | A     | 1904  | -126   | -125,3 |
| PF00102     | P23470  | 3qci | A     | 1060  | -120,9 | -116,7 |
| PF00102     | P26045  | 2b49 | A     | 842   | -129,4 | -137,3 |
| PF00102     | P28827  | 1rpm | B     | 1095  | -125,3 | -124,9 |
| PF00102     | P29074  | 2i75 | A     | 852   | -122,1 | -121,2 |
| PF00102     | P35992  | 3s3e | B     | 242   | -119,6 | -125,9 |
| PF00102     | P74873  | 1g4w | R     | 481   | -118,8 | -129,8 |
| PF00102     | Q06124  | 2shp | A     | 459   | -133,2 | -127,5 |
| PF00102     | Q12923  | 1wch | A     | 2408  | -143,2 | -122,6 |
| PF00102     | Q13332  | 2fh7 | A     | 1880  | -123   | -117   |
| PF00102     | Q15256  | 2a8b | A     | 588   | -126,5 | -110,6 |
| PF00102     | Q15262  | 2c7s | A     | 1083  | -123,1 | -119   |
| PF00102     | Q15678  | 2bzl | A     | 1121  | -133,7 | -124,1 |
| PF00102     | Q16827  | 2git | A     | 1136  | -127,7 | -115,6 |
| PF00102     | Q16849  | 2i1y | A     | 909   | -129,7 | -114,9 |
| PF00102     | Q3MIV7  | 2h04 | A     | 1904  | -133,1 | -125,9 |
| PF00102     | Q59EE0  | 2nlk | A     | 1060  | -135,4 | -124   |
| PF00102     | Q62132  | 1jln | A     | 480   | -135,5 | -122,9 |
| PF00102     | Q62884  | 3i36 | A     | 1118  | -127,5 | -120,5 |
| PF00102     | Q7ARH8  | 2y2f | A     | 403   | -115,9 | -122   |
| PF00102     | Q7WUJ1  | 3d1o | B     | 252   | -130,8 | -138,4 |
| PF00102     | Q92932  | 2qep | B     | 945   | -142,9 | -102,9 |
| PF00102     | Q97VZ7  | 2i6j | A     | 96    | -129,9 | -132,7 |
| PF00102     | Q99952  | 2oc3 | A     | 229   | -129,7 | -139,2 |
| PF00102     | Q9Y2R2  | 2p6x | B     | 227   | -125,2 | -138   |
| PF00106     | A4VVQ2  | 3cxr | A     | 149   | -93,5  | -139,6 |
| PF00106     | P10807  | 1b16 | B     | 137   | -99,5  | -114,8 |
| PF00106     | Q48436  | 1geg | A     | 138   | -110,1 | -141,8 |
| PF00117     | O59071  | 1wl8 | A     | 79    | 57,9   | -102,4 |
| PF00117     | P00900  | 1i7q | B     | 85    | 57,3   | -94,5  |
| PF00117     | P00905  | 1i1q | B     | 83    | 59,9   | -115   |
| PF00117     | P00907  | 1jdb | F     | 269   | 58,3   | -107,7 |
| PF00117     | P04079  | 1gpm | C     | 86    | 56,8   | -111,8 |
| PF00117     | P0A6F1  | 1bxr | H     | 269   | 55     | -97,4  |
| PF00117     | P0A7E5  | 1s1m | A     | 379   | 52,1   | -114,1 |
| PF00117     | P33734  | 1ox6 | B     | 83    | 58,2   | -111,8 |
| PF00117     | P49915  | 2vpi | A     | 104   | 56,2   | -108,7 |
| PF00117     | Q06129  | 1qdl | B     | 84    | 60,5   | -110,7 |
| PF00117     | Q1H479  | 3m3p | A     | 89    | 58,2   | -114,4 |
| PF00117     | Q5SI28  | 2ywc | C     | 78    | 50,5   | -106,3 |
| PF00117     | Q5SIA8  | 1vcm | A     | 391   | 52,4   | -106,2 |
| PF00117     | Q7SIC0  | 1ka9 | H     | 82    | 55,8   | -100,4 |
| PF00117     | Q980S6  | 3nva | B     | 386   | 59,3   | -111,3 |

Table S4

|         |        |           |   |     |        |        |
|---------|--------|-----------|---|-----|--------|--------|
| PF00117 | Q9HJM3 | 2a9v      | B | 80  | 59,2   | -109,3 |
| PF00117 | Q9NRF8 | 2vkt      | A | 399 | 65,9   | -110,9 |
| PF00117 | Q9X0C8 | 1gpw      | B | 84  | 67     | -132,9 |
| PF00142 | P00459 | 1g20      | E | 151 | -143,6 | -149,5 |
| PF00162 | P00560 | 3pgk      | A | 97  | -130,2 | -99    |
| PF00300 | P07953 | 1tip      | A | 142 | -128,5 | -137,3 |
| PF00300 | P16118 | 1k6m      | B | 391 | -133   | -128,5 |
| PF00300 | P25114 | 1bif      | A | 389 | -132,9 | -134,3 |
| PF00300 | Q16875 | 2axn      | A | 386 | -133,1 | -134,8 |
| PF00384 | P81186 | 2nap      | A | 307 | -139,2 | -135,9 |
| PF00581 | E2QRA0 | 3p3a      | B | 246 | -144,3 | -126,5 |
| PF00581 | O05793 | 3hwi      | A | 233 | -131,3 | -137,6 |
| PF00581 | P00586 | 1orb      | A | 247 | -161   | -128,6 |
| PF00581 | P25325 | 3olh      | A | 248 | -165,2 | -148,8 |
| PF00581 | P30304 | 1c25      | A | 430 | -134,4 | -128,6 |
| PF00581 | P30305 | 2ifd      | A | 473 | -135,9 | -140,3 |
| PF00581 | P42937 | 3f4a      | A | 90  | -130,2 | -137,4 |
| PF00581 | P52197 | 1h4m      | X | 230 | -139,7 | -125,3 |
| PF00581 | P78067 | 3ipp      | B | 385 | -143,8 | -130,2 |
| PF00581 | P96888 | 3hzu      | A | 245 | -143,1 | -119,4 |
| PF00581 | Q12305 | 3d1p      | A | 98  | -134,3 | -124,1 |
| PF00581 | Q5SHV8 | 2eg4      | A | 191 | -157,2 | -131,1 |
| PF00581 | Q6Q1Q5 | 2j6p      | F | 75  | -125,4 | -138,4 |
| PF00581 | Q81UT5 | 3icr      | A | 514 | -119,5 | -147,3 |
| PF00680 | P12916 | 1xr6      | A | 289 | -161,3 | -137,3 |
| PF00782 | O95147 | 2wgp      | A | 111 | -128,9 | -139   |
| PF00782 | P24656 | 1yn9      | C | 119 | -124,3 | -148,1 |
| PF00782 | P33064 | 2p4d      | A | 110 | -126,1 | -142,7 |
| PF00782 | P51452 | 1vhr      | B | 124 | -141,6 | -143,6 |
| PF00782 | P60484 | 1d5r      | A | 124 | -129,3 | -126,3 |
| PF00782 | Q4QEZ7 | 3s4o      | A | 112 | -131,5 | -103,5 |
| PF00782 | Q66GT5 | 3rgo      | A | 102 | -124,9 | -103,6 |
| PF00782 | Q68J44 | 2y96      | A | 147 | -134,4 | -132,9 |
| PF00782 | Q8NEJ0 | 2esb      | A | 104 | -138,2 | -143,3 |
| PF00782 | Q9BVJ7 | 2img      | A | 95  | -137,6 | -146,4 |
| PF00782 | Q9NRW4 | 1wrm      | A | 88  | -131,4 | -143,8 |
| PF00782 | Q9UII6 | 2pq5      | C | 138 | -134,9 | -133,8 |
| PF00782 | Q9Y6W6 | 1zzw      | B | 408 | -139,6 | -119,4 |
| PF00795 | O25836 | 2dyv      | B | 166 | 53     | -106,1 |
| PF00795 | P49954 | 1f89      | B | 469 | 32,4   | -97,5  |
| PF00795 | P60327 | 1erz      | A | 171 | 43,7   | -117,3 |
| PF00795 | Q44185 | 1fo6      | C | 172 | 47,3   | -117,8 |
| PF00795 | Q82AV7 | 3n05      | B | 161 | 36,2   | -94,6  |
| PF00795 | Q8P8M3 | 2,00E+011 | D | 143 | 41,8   | -107,9 |
| PF00795 | Q9L543 | 2plq      | A | 166 | 45,6   | -109,1 |
| PF00857 | Q82NB5 | 3kl2      | D | 180 | -122,9 | -90    |
| PF01008 | Q5JFM9 | 3a11      | B | 133 | 55,8   | -149,6 |
| PF01083 | P00590 | 1cuj      | A | 120 | 54,6   | -123   |
| PF01174 | P37528 | 2nv2      | P | 79  | 66,3   | -99,6  |
| PF01174 | P83813 | 1q7r      | A | 78  | 54,2   | -136   |
| PF01174 | Q59055 | 2ywj      | A | 75  | 56,5   | -99,4  |
| PF01174 | Q5ND68 | 2abw      | A | 87  | 53,2   | -109,5 |
| PF01174 | Q5SKD6 | 2ywd      | A | 81  | 61,2   | -108,7 |
| PF01329 | P61459 | 1dco      | G | 82  | -95,8  | -91,1  |

Table S4

|         |        |      |   |      |        |        |
|---------|--------|------|---|------|--------|--------|
| PF01738 | A6TGL0 | 3f67 | A | 120  | 65,3   | -118,9 |
| PF01909 | P06766 | 2van | A | 178  | -105,8 | -140,9 |
| PF01909 | Q5SJ64 | 3au2 | A | 186  | -113,5 | -138,9 |
| PF01909 | Q9UGP5 | 2pfn | A | 415  | -111   | -141,3 |
| PF01965 | A9CJS5 | 2fex | B | 101  | 67,8   | -137,1 |
| PF01965 | B6YXG0 | 3l18 | A | 100  | 63,7   | -120,6 |
| PF01965 | O59413 | 1g2i | A | 100  | 59,7   | -115,1 |
| PF01965 | P31658 | 1n57 | A | 185  | 65,5   | -116   |
| PF01965 | P96658 | 3f5d | A | 100  | 54,8   | -127,8 |
| PF01965 | Q04432 | 1rw7 | A | 138  | 70,4   | -121,9 |
| PF01965 | Q08914 | 3kkl | A | 138  | 75,3   | -116   |
| PF01965 | Q2GI86 | 3l3b | A | 137  | 64,5   | -113,8 |
| PF01965 | Q46948 | 2ab0 | A | 106  | 55,7   | -112,2 |
| PF01965 | Q81PY3 | 3efe | B | 110  | 65,3   | -130,9 |
| PF01965 | Q8A8A4 | 3cne | D | 111  | 52,7   | -106,4 |
| PF01965 | Q99497 | 1pdw | H | 3306 | 68     | -108,5 |
| PF01965 | Q9HEU1 | 3n7t | A | 141  | 79,7   | -100,6 |
| PF01965 | Q9KPQ8 | 3ot1 | A | 108  | 64,8   | -125,8 |
| PF02550 | Q9RM86 | 3gk7 | B | 32   | 57,7   | -113,9 |
| PF02574 | Q93088 | 1lt8 | A | 299  | -123,9 | -144,2 |
| PF02574 | Q9WYA5 | 1q85 | B | 272  | -114,3 | -149,8 |
| PF02774 | P44801 | 1oza | A | 136  | 42,8   | -138,4 |
| PF02776 | POCH62 | 2pgn | B | 77   | -8     | -91,4  |
| PF02826 | P60802 | 3oet | G | 207  | -101,9 | -90,4  |
| PF02979 | O66188 | 2dd4 | L | 131  | -172,3 | -122,6 |
| PF03372 | P00639 | 2a42 | B | 173  | 60,7   | -129,7 |
| PF04204 | Q72X44 | 2ghr | A | 142  | 44,8   | -116,9 |
| PF04273 | A4Y1H6 | 3gxx | A | 125  | -145,5 | -137,7 |
| PF07722 | Q92820 | 1l9x | B | 110  | 53,3   | -101   |
| PF07722 | Q92AL3 | 3fij | F | 115  | 47,4   | -108,7 |
| PF11486 | O34626 | 2euc | A | 29   | -70,9  | -120,8 |
| PF12695 | Q01609 | 2hdw | A | 179  | 52,7   | -128,2 |
| PF12850 | Q9QZ88 | 1z2w | A | 41   | 82,2   | -140   |
| PF13278 | A3QGx4 | 3bhn | A | 100  | 47,9   | -124,8 |
| PF13278 | Q4K977 | 3nor | A | 104  | 65,2   | -134,3 |
| PF13278 | Q881P0 | 3ewn | A | 154  | 59,8   | -143   |
| PF13278 | Q97FB4 | 3mgk | A | 102  | 60,1   | -142,5 |
| PF13350 | A1QMT0 | 2oz5 | A | 160  | -130,8 | -124,5 |
| PF13350 | A3QMF6 | 3f41 | A | 548  | -124,9 | -134,8 |
| PF13350 | P96830 | 1ywf | A | 160  | -127,3 | -126,5 |
