# Supplementary material for: Protein Topology Determines Cysteine Oxidation Fate: The Case of Sulfenyl Amide Formation among Protein Families
Source: PubMed Central journal article supplement (PMC4351059; doi:10.1371/journal.pcbi.1004051), 2015-03-05
Supplement: pcbi.1004051.s016.pdf [file pcbi.1004051.s016.pdf]

**Table S5. Protein Crystal structures with cysteine sulfenic acid.**

| PDBid | Chain | ResID |
|-------|-------|-------|
| 3A8G  | A     | 114   |
| 3A8H  | A     | 114   |
| 3A8L  | A     | 114   |
| 3A8O  | A     | 114   |
| 3AAY  | A     | 233   |
| 3AAY  | B     | 233   |
| 2AF4  | C     | 159   |
| 2AF4  | D     | 159   |
| 2AHJ  | A     | 114   |
| 2AHJ  | C     | 114   |
| 4AL3  | A     | 90    |
| 2AOT  | A     | 217   |
| 2AOT  | A     | 248   |
| 2AOT  | B     | 82    |
| 2AOT  | B     | 248   |
| 2AOU  | A     | 217   |
| 2AOU  | B     | 82    |
| 2AQ5  | A     | 78    |
| 2AQ5  | A     | 90    |
| 2AQ5  | A     | 152   |
| 2AQ5  | A     | 332   |
| 4ASC  | A     | 340   |
| 4AYC  | B     | 456   |
| 4AZ4  | A     | 129   |
| 3B4Y  | A     | 95    |
| 3B4Y  | B     | 95    |
| 3B8B  | A     | 133   |
| 3BB0  | A     | 69    |
| 3BE9  | A     | 89    |
| 2BFZ  | B     | 221   |
| 2BG7  | A     | 221   |
| 2BG7  | B     | 221   |
| 2BG8  | A     | 221   |
| 2BJA  | A     | 322   |
| 2BJA  | B     | 322   |
| 3B00  | B     | 1     |
| 3BQG  | A     | 207   |
| 2BWS  | A     | 249   |
| 2BWV  | A     | 249   |
| 3C6B  | A     | 60    |
| 2C9S  | A     | 111   |
| 2C9S  | F     | 111   |
| 2CFH  | C     | 32    |
| 2CFH  | D     | 32    |
| 2CIR  | A     | 287   |
| 2CIS  | A     | 287   |
| 3CIW  | A     | 183   |
| 3CIW  | A     | 322   |
| 3CIX  | A     | 183   |
| 3CJF  | A     | 860   |

Table S5

|      |   |      |
|------|---|------|
| 3CJF | A | 1005 |
| 3CJF | A | 1022 |
| 3CJF | A | 1043 |
| 3CJF | A | 1114 |
| 3CJG | A | 860  |
| 3CJG | A | 1022 |
| 3CKC | A | 322  |
| 3CKC | B | 322  |
| 3CUS | Q | 543  |
| 3CUS | R | 543  |
| 3CUS | S | 543  |
| 2CVO | A | 145  |
| 2CVO | B | 145  |
| 2CVO | C | 145  |
| 2CVO | D | 145  |
| 3CV2 | A | 438  |
| 3CV2 | B | 438  |
| 1CXP | C | 150  |
| 1CXP | D | 150  |
| 2CYZ | A | 114  |
| 2CZ1 | A | 114  |
| 2CZ6 | A | 114  |
| 2CZ7 | A | 114  |
| 2D1Q | A | 63   |
| 2D1Q | A | 64   |
| 2D1R | A | 63   |
| 2D1R | A | 64   |
| 2D1S | A | 64   |
| 2D1T | A | 64   |
| 1D2V | C | 150  |
| 1D2V | D | 150  |
| 3D3W | A | 138  |
| 2D4L | A | 126  |
| 2D4M | A | 126  |
| 1D5L | C | 150  |
| 1D5L | D | 150  |
| 1D7W | C | 150  |
| 1D7W | D | 150  |
| 3D7Z | A | 119  |
| 3D83 | A | 119  |
| 3D83 | A | 162  |
| 2DD5 | C | 133  |
| 2DD5 | F | 133  |
| 2DD5 | I | 133  |
| 2DD5 | L | 133  |
| 4DFE | A | 123  |
| 4DFE | B | 123  |
| 4DFE | C | 123  |
| 4DFE | D | 123  |
| 4DGN | A | 89   |
| 4DL1 | C | 150  |
| 4DL1 | D | 150  |
| 4DL1 | G | 150  |
| 4DL1 | H | 150  |

Table S5

|       |   |     |
|-------|---|-----|
| 4DL1  | K | 150 |
| 4DL1  | L | 150 |
| 4DL1  | O | 150 |
| 4DL1  | P | 150 |
| 1DMP  | A | 67  |
| 1DMP  | B | 67  |
| 1DNU  | C | 150 |
| 1DNU  | D | 150 |
| 1DNW  | C | 150 |
| 1DNW  | D | 150 |
| 2DPP  | A | 121 |
| 3DQY  | A | 69  |
| 2DXB  | C | 133 |
| 2DXB  | F | 133 |
| 2DXB  | I | 133 |
| 2DXB  | L | 133 |
| 2DXB  | O | 133 |
| 2DXB  | R | 133 |
| 2DXB  | U | 133 |
| 2DXB  | X | 133 |
| 2DXC  | C | 133 |
| 2DXC  | F | 133 |
| 2DXC  | I | 133 |
| 2DXC  | L | 133 |
| ##### | A | 48  |
| ##### | A | 162 |
| ##### | A | 162 |
| 2EG4  | B | 191 |
| 2EJD  | A | 322 |
| 2EJD  | B | 322 |
| 2EJL  | A | 322 |
| 2EJL  | B | 322 |
| 4EOC  | A | 188 |
| 1EQ2  | A | 78  |
| 1EQ2  | B | 78  |
| 1EQ2  | C | 78  |
| 1EQ2  | D | 78  |
| 1EQ2  | E | 78  |
| 1EQ2  | F | 78  |
| 1EQ2  | G | 78  |
| 1EQ2  | H | 78  |
| 1EQ2  | I | 78  |
| 1EQ2  | J | 78  |
| 2ES4  | D | 92  |
| 2ES4  | E | 92  |
| 4ESY  | B | 346 |
| 4EVX  | A | 12  |
| 4EVX  | B | 12  |
| 2F2L  | A | 414 |
| 1F3B  | A | 111 |
| 1F3B  | B | 111 |
| 3F71  | A | 106 |
| 3F9P  | C | 150 |
| 3F9P  | D | 150 |

Table S5

|      |   |     |
|------|---|-----|
| 3FE5 | A | 23  |
| 3FE5 | A | 134 |
| 3FE5 | A | 182 |
| 2FHJ | D | 58  |
| 2FHX | B | 221 |
| 3FL5 | A | 89  |
| 1FNJ | A | 75  |
| 3FSG | A | 35  |
| 3FSG | B | 35  |
| 3FSG | C | 35  |
| 4FST | A | 168 |
| 4FSW | A | 168 |
| 4FSY | A | 57  |
| 4FSZ | A | 57  |
| 4FSZ | A | 168 |
| 4FT3 | A | 168 |
| 4FT3 | A | 215 |
| 4FTA | A | 168 |
| 4FTC | A | 168 |
| 4FTN | A | 168 |
| 4FTQ | A | 168 |
| 1FZJ | A | 121 |
| 1FZK | A | 121 |
| 1FZM | A | 121 |
| 1FZO | A | 121 |
| 4G22 | A | 142 |
| 4G22 | A | 364 |
| 4G22 | B | 142 |
| 4G22 | B | 364 |
| 4G2M | A | 364 |
| 1G55 | A | 140 |
| 1G55 | A | 287 |
| 4GH2 | A | 168 |
| 4GH2 | A | 215 |
| 1GNS | A | 221 |
| 1GR7 | A | 26  |
| 1GR7 | B | 26  |
| 1GR7 | C | 26  |
| 1GR7 | D | 26  |
| 1GSN | A | 63  |
| 1GSN | A | 234 |
| 1GSN | A | 284 |
| 1GSN | A | 423 |
| 4GSB | A | 63  |
| 1GZW | A | 16  |
| 2HCJ | B | 81  |
| 4HHC | A | 669 |
| 1HIV | A | 67  |
| 1HIV | B | 67  |
| 1HKU | A | 27  |
| 2HP0 | B | 271 |
| 2HPR | A | 83  |
| 3HRM | A | 13  |
| 3HRM | B | 13  |

Table S5

|      |   |     |
|------|---|-----|
| 1HVR | A | 67  |
| 1HVR | B | 67  |
| 1I9T | A | 126 |
| 2IBU | A | 126 |
| 2IBU | B | 126 |
| 2IBU | C | 126 |
| 2IBU | D | 126 |
| 2IBW | A | 126 |
| 2IBW | B | 126 |
| 2IBW | C | 126 |
| 2IBW | D | 126 |
| 2IBY | A | 126 |
| 2IBY | B | 126 |
| 2IBY | C | 126 |
| 2IBY | D | 126 |
| 3IB4 | A | 80  |
| 2ID4 | A | 190 |
| 2ID4 | B | 190 |
| 3IG5 | A | 70  |
| 3IIX | A | 183 |
| 3IIX | A | 322 |
| 3IIZ | A | 183 |
| 3IL4 | A | 13  |
| 3IL4 | A | 22  |
| 3IL4 | B | 13  |
| 3IL4 | B | 22  |
| 3IL4 | C | 13  |
| 3IL4 | C | 22  |
| 3IL4 | D | 13  |
| 3IL4 | D | 22  |
| 3IPH | A | 119 |
| 3IPH | A | 162 |
| 3IQJ | A | 259 |
| 3IQU | A | 38  |
| 3IQV | A | 38  |
| 1IRE | A | 113 |
| 2ISY | A | 102 |
| 2ISY | B | 102 |
| 3IS2 | A | 71  |
| 3IV0 | A | 191 |
| 2J40 | A | 322 |
| 2J40 | B | 322 |
| 2J89 | A | 81  |
| 1JOA | A | 42  |
| 3JWA | A | 4   |
| 3JWB | A | 4   |
| 1JZ7 | A | 247 |
| 1JZ7 | B | 247 |
| 1JZ7 | C | 247 |
| 1JZ7 | D | 247 |
| 1K3I | A | 228 |
| 3K94 | A | 26  |
| 3K94 | A | 95  |
| 3K94 | A | 176 |

Table S5

|      |   |      |
|------|---|------|
| 3K94 | A | 185  |
| 3K94 | B | 26   |
| 3K94 | B | 95   |
| 3K94 | B | 176  |
| 3K94 | B | 185  |
| 3KEV | A | 58   |
| 3KMZ | C | 2056 |
| 3KMZ | D | 2056 |
| 3KXG | A | 89   |
| 3KXH | A | 89   |
| 3LAC | A | 143  |
| 3LAC | B | 143  |
| 1LEG | A | 121  |
| 1LEK | A | 121  |
| 1LG7 | A | 135  |
| 1LOQ | A | 65   |
| 3LW1 | A | 38   |
| 3M2M | A | 88   |
| 3M2M | A | 130  |
| 3M2M | B | 88   |
| 3M2M | B | 130  |
| 3M2M | C | 88   |
| 3M2M | C | 130  |
| 3M2M | D | 88   |
| 3M2M | D | 130  |
| 3M2M | E | 88   |
| 3M2M | E | 130  |
| 3M2M | F | 88   |
| 3M2M | F | 130  |
| 3M2M | G | 88   |
| 3M2M | G | 130  |
| 3M2M | H | 88   |
| 3M2M | H | 130  |
| 1ME8 | A | 319  |
| 1ME9 | A | 319  |
| 1MEH | A | 319  |
| 3MHR | A | 38   |
| 3MII | A | 138  |
| 3MII | B | 138  |
| 1MJB | A | 304  |
| 3MKJ | A | 4    |
| 3MKJ | A | 115  |
| 3MKJ | A | 193  |
| 3MKJ | A | 245  |
| 1ML6 | A | 111  |
| 1ML6 | B | 411  |
| 3N80 | A | 302  |
| 3N80 | B | 302  |
| 3N80 | C | 302  |
| 3N80 | D | 302  |
| 3N80 | E | 302  |
| 3N80 | F | 302  |
| 3N80 | G | 302  |
| 3N80 | H | 302  |

Table S5

|      |   |     |
|------|---|-----|
| 3NA4 | A | 25  |
| 3NA8 | A | 211 |
| 3NA8 | B | 211 |
| 3NA8 | C | 211 |
| 3NA8 | D | 211 |
| 3NJQ | A | 16  |
| 3NJQ | B | 16  |
| 3NJQ | B | 179 |
| 3NON | A | 101 |
| 3NON | B | 104 |
| 2NQA | A | 54  |
| 2NQA | A | 82  |
| 2NQA | A | 98  |
| 2NQA | A | 191 |
| 2NQA | A | 233 |
| 2NQA | B | 54  |
| 2NQA | B | 82  |
| 2NQA | B | 98  |
| 2NQA | B | 191 |
| 2NQA | B | 233 |
| 104C | A | 44  |
| 104F | A | 44  |
| 104G | A | 44  |
| 207Q | A | 391 |
| 207Q | A | 424 |
| 207S | A | 391 |
| 207S | A | 424 |
| 108V | A | 63  |
| 109Q | A | 155 |
| 109Q | B | 155 |
| 1OET | A | 215 |
| 3OP0 | A | 182 |
| 3OP0 | A | 202 |
| 3OP0 | B | 182 |
| 3OP0 | B | 202 |
| 2ORA | A | 247 |
| 3OT4 | A | 150 |
| 3OT4 | B | 150 |
| 3OT4 | C | 150 |
| 3OT4 | D | 150 |
| 3OT4 | E | 150 |
| 3OT4 | F | 150 |
| 3OT4 | G | 150 |
| 3OT4 | H | 150 |
| 1OU6 | A | 89  |
| 1OU6 | B | 89  |
| 1OU6 | C | 89  |
| 1OU6 | D | 89  |
| 3OY8 | A | 16  |
| 3OY8 | A | 88  |
| 3OY8 | B | 16  |
| 3OYW | A | 16  |
| 3OYW | A | 88  |
| 3OYW | B | 16  |

Table S5

|      |   |      |
|------|---|------|
| 3P1N | A | 38   |
| 3P1O | A | 38   |
| 3P5V | A | 25   |
| 3P5X | A | 25   |
| 1P7T | A | 617  |
| 1P7T | B | 617  |
| 1P7T | B | 688  |
| 3PEF | A | 52   |
| 3PEF | B | 52   |
| 3PEF | C | 52   |
| 3PEF | D | 52   |
| 3PEF | E | 52   |
| 3PEF | F | 52   |
| 3PEF | G | 52   |
| 3PEF | H | 52   |
| 4PGT | A | 101  |
| 4PGT | B | 101  |
| 1PKW | A | 112  |
| 1PKW | B | 112  |
| 1PKZ | A | 112  |
| 1PKZ | B | 112  |
| 1PL1 | A | 112  |
| 1PL1 | B | 112  |
| 1PL2 | A | 112  |
| 1PL2 | B | 112  |
| 1PRX | A | 47   |
| 1PRX | B | 47   |
| 3PR6 | A | 6    |
| 2PVH | A | 89   |
| 2PVJ | A | 89   |
| 2PVK | A | 89   |
| 2PVL | A | 89   |
| 2PVM | A | 89   |
| 2PVN | A | 89   |
| 3PVG | A | 89   |
| 1Q79 | A | 160  |
| 2Q9J | A | 73   |
| 1QBS | A | 67   |
| 1QBS | B | 67   |
| 2QC6 | A | 89   |
| 3QD5 | A | 76   |
| 3QD5 | B | 76   |
| 1QQF | A | 1010 |
| 3QSB | B | 260  |
| 3QSR | A | 224  |
| 2QTL | A | 340  |
| 2QTL | A | 364  |
| 2QTL | A | 421  |
| 2QTZ | A | 340  |
| 2QTZ | A | 421  |
| 1QVZ | A | 138  |
| 1QVZ | B | 138  |
| 2QX0 | A | 37   |
| 2QX0 | B | 37   |

Table S5

|      |   |     |
|------|---|-----|
| 3R0B | A | 634 |
| 3R0B | A | 669 |
| 3R0B | B | 634 |
| 3R0B | C | 634 |
| 3R0B | D | 669 |
| 3R0B | E | 634 |
| 3R0B | E | 669 |
| 2RFV | A | 4   |
| 2RG2 | A | 2   |
| 3RJT | A | 18  |
| 3RJT | B | 18  |
| 3ROJ | A | 286 |
| 3ROJ | B | 286 |
| 3ROJ | C | 286 |
| 3ROJ | D | 286 |
| 3RPL | B | 281 |
| 3RPL | B | 286 |
| 1RQ4 | B | 93  |
| 1RQ4 | D | 93  |
| 3RVA | A | 230 |
| 1SBH | A | 206 |
| 1SBI | A | 206 |
| 3SF8 | A | 106 |
| 1SK4 | A | 300 |
| 3SS6 | A | 88  |
| 3SS6 | B | 88  |
| 3SUJ | A | 63  |
| 1SVY | A | 235 |
| 3T6E | M | 160 |
| 3T8T | A | 25  |
| 3TJJ | A | 124 |
| 3TJJ | B | 124 |
| 3TJJ | C | 124 |
| 3TJJ | D | 124 |
| 3TJJ | E | 124 |
| 3TKS | A | 87  |
| 3TKS | B | 87  |
| 3TP1 | A | 44  |
| 3TPS | A | 44  |
| 3TRN | A | 44  |
| 3TS6 | A | 44  |
| 3TU8 | A | 94  |
| 3U11 | A | 586 |
| 3U11 | B | 586 |
| 3U2A | A | 97  |
| 3U7E | B | 450 |
| 3U7F | B | 450 |
| 3U7H | B | 450 |
| 3U9X | A | 38  |
| 3UAO | A | 150 |
| 3UAO | B | 150 |
| 3UAO | C | 150 |
| 3UAO | D | 150 |
| 3UAO | E | 150 |

Table S5

|      |   |     |
|------|---|-----|
| 3UA0 | F | 150 |
| 3UA0 | G | 150 |
| 3UA0 | H | 150 |
| 1UB7 | A | 110 |
| 1UB7 | B | 110 |
| 1UB7 | C | 110 |
| 1UB7 | D | 110 |
| 3UBW | A | 98  |
| 1UGP | A | 113 |
| 1UGR | A | 113 |
| 3UU7 | A | 381 |
| 3UU7 | A | 417 |
| 3UU7 | B | 381 |
| 3UU7 | B | 417 |
| 3UU7 | B | 530 |
| 3UUA | A | 381 |
| 3UUA | B | 381 |
| 3UUA | B | 530 |
| 3UUC | A | 381 |
| 3UUC | B | 381 |
| 3UUC | C | 381 |
| 3UUC | D | 381 |
| 3UUD | A | 381 |
| 3UUD | A | 530 |
| 3UUD | B | 381 |
| 3UUD | B | 417 |
| 2V3X | A | 249 |
| 2V3Y | A | 249 |
| 2V3Z | A | 249 |
| 2V5B | A | 118 |
| 2VEC | A | 122 |
| 1VHQ | A | 138 |
| 1VHQ | B | 138 |
| 2VH3 | B | 65  |
| 2VL2 | A | 151 |
| 2VL2 | B | 151 |
| 2VR8 | A | 111 |
| 2VR8 | F | 111 |
| 2VRN | A | 115 |
| 2VRN | B | 115 |
| 2VT8 | A | 17  |
| 2VT8 | A | 36  |
| 2VT8 | B | 17  |
| 2VT8 | B | 36  |
| 2VU0 | A | 89  |
| 2VU0 | B | 89  |
| 2VU0 | C | 89  |
| 2VU0 | D | 89  |
| 2VU1 | A | 89  |
| 2VU1 | B | 89  |
| 2VU1 | C | 89  |
| 2VU1 | D | 89  |
| 1W2M | A | 249 |
| 1W2M | B | 249 |

Table S5

|      |   |      |
|------|---|------|
| 1W2M | C | 249  |
| 1W2M | D | 249  |
| 1W2M | E | 249  |
| 1W2M | F | 249  |
| 1W6M | A | 1016 |
| 1W6N | A | 1016 |
| 1W6O | A | 1016 |
| 1W6P | A | 1016 |
| 1W6Q | A | 1016 |
| 2WAW | A | 81   |
| 2WEE | A | 177  |
| 2WEE | B | 177  |
| 2WKO | F | 111  |
| 2WKT | A | 89   |
| 2WKT | B | 89   |
| 2WKT | D | 89   |
| 1WL4 | A | 92   |
| 1WL5 | A | 92   |
| 1WL8 | A | 148  |
| 1WL9 | A | 249  |
| 2WL4 | B | 89   |
| 2WL4 | D | 89   |
| 2WL5 | A | 89   |
| 2WL5 | B | 89   |
| 2WME | C | 286  |
| 2WME | E | 286  |
| 1WUH | L | 84   |
| 1WUH | L | 546  |
| 1WUI | L | 84   |
| 1WUI | L | 546  |
| 1WUJ | L | 546  |
| 1WUK | L | 546  |
| 1WUL | L | 546  |
| 2WYZ | A | 111  |
| 2WYZ | F | 111  |
| 2X2H | A | 336  |
| 2X2H | B | 336  |
| 2X2H | C | 336  |
| 2X2H | D | 336  |
| 2X2I | A | 336  |
| 2X2I | B | 336  |
| 2X2I | C | 336  |
| 2X2I | D | 336  |
| 2X2J | A | 336  |
| 2X2J | B | 336  |
| 2X2J | C | 336  |
| 2X2J | D | 336  |
| 1XAE | A | 21   |
| 1XAE | A | 47   |
| 1XAE | B | 21   |
| 1XAE | B | 47   |
| 1XCM | A | 118  |
| 2XF1 | A | 34   |
| 1XVW | A | 45   |

Table S5

|      |   |     |
|------|---|-----|
| 1XVW | B | 45  |
| 2XZD | A | 163 |
| 2XZD | C | 163 |
| 2XZT | A | 163 |
| 2XZT | C | 163 |
| 2Y0B | A | 163 |
| 2Y0B | C | 163 |
| 2Y0M | A | 316 |
| 2Y0M | A | 416 |
| 1Y1F | X | 336 |
| 2Y6U | A | 26  |
| 2Y6U | A | 127 |
| 2Y6U | A | 205 |
| 2Y6U | A | 298 |
| 2Y6V | A | 26  |
| 2Y6V | A | 127 |
| 2Y6V | A | 205 |
| 2Y6V | A | 298 |
| 2Y6V | B | 26  |
| 2Y6V | B | 127 |
| 2Y6V | B | 205 |
| 2Y6V | B | 298 |
| 2Y6V | C | 26  |
| 2Y6V | C | 127 |
| 2Y6V | C | 205 |
| 2Y6V | C | 298 |
| 2YES | A | 177 |
| 2YES | B | 177 |
| 1YJA | A | 206 |
| 1YJB | A | 206 |
| 1YJC | A | 206 |
| 1YML | A | 473 |
| 2Z2W | A | 509 |
| 2ZCF | A | 114 |
| 2ZCT | A | 50  |
| 2ZCT | B | 50  |
| 2ZCT | C | 50  |
| 2ZCT | D | 50  |
| 2ZCT | E | 50  |
| 2ZCT | F | 50  |
| 2ZCT | G | 50  |
| 2ZCT | H | 50  |
| 2ZCT | I | 50  |
| 2ZCT | J | 50  |
| 2ZPB | A | 114 |
| 2ZPE | A | 114 |
| 2ZPF | A | 114 |
| 2ZPG | A | 114 |
| 2ZPH | A | 114 |
| 2ZPI | A | 114 |
| 1ZSF | A | 67  |
| 1ZSF | B | 167 |
| 1ZSR | A | 67  |
| 1ZSR | B | 167 |

Table S5

|      |   |     |
|------|---|-----|
| 3ZS0 | C | 150 |
| 3ZS0 | D | 150 |
| 3ZS1 | C | 150 |
| 3ZS1 | D | 150 |
| 3ZVH | A | 361 |
| 1ZW6 | A | 51  |
