# Supplementary material for: Protein Topology Determines Cysteine Oxidation Fate: The Case of Sulfenyl Amide Formation among Protein Families
Source: PubMed Central journal article supplement (PMC4351059; doi:10.1371/journal.pcbi.1004051), 2015-03-05
Supplement: pcbi.1004051.s017.pdf [file pcbi.1004051.s017.pdf]

**Table S6. HMM search results against Swiss-Prot database.**  
Highlighted in bold are the seven families described in the main text.

| <b>PFAM Family</b> | <b>Family</b>        | <b>Number</b> | <b>Score</b> | <b>Sd Dev</b> |
|--------------------|----------------------|---------------|--------------|---------------|
| <b>PF00102</b>     | <b>Y_phosphatase</b> | <b>147</b>    | <b>33.72</b> | <b>12.68</b>  |
| <b>PF00782</b>     | <b>DSPc</b>          | <b>166</b>    | <b>23.43</b> | <b>6.36</b>   |
| PF14671            | DSPn                 | 9             | 22.64        | 1.9           |
| PF09192            | Act-Frag_cataly      | 1             | 21.5         | 0             |
| <b>PF00117</b>     | <b>GATase</b>        | <b>1665</b>   | <b>17.74</b> | <b>3.62</b>   |
| <b>PF00795</b>     | <b>CN_hydrolase</b>  | <b>31</b>     | <b>16.51</b> | <b>2.23</b>   |
| PF00988            | CPSase_sm_chain      | 1             | 16.3         | 0             |
| <b>PF01174</b>     | <b>SNO</b>           | <b>144</b>    | <b>15.8</b>  | <b>4.59</b>   |
| PF06418            | CTP_synth_N          | 8             | 15.79        | 3.71          |
| PF14566            | PTPlike_phytase      | 5             | 15.5         | 3.44          |
| <b>PF01965</b>     | <b>DJ-1_PfpI</b>     | <b>63</b>     | <b>15.08</b> | <b>4.05</b>   |
| PF07722            | Peptidase_C26        | 12            | 14.95        | 3.26          |
| PF06602            | Myotub-related       | 8             | 14.55        | 1.96          |
| PF13606            | Ank_3                | 1             | 14.4         | 0             |
| PF02075            | RuvC                 | 1             | 14.3         | 0             |
| PF13507            | GATase_5             | 156           | 14.21        | 2.35          |
| PF00885            | DMRL_synthase        | 3             | 13.8         | 0             |
| <b>PF00581</b>     | <b>Rhodanese</b>     | <b>27</b>     | <b>13.36</b> | <b>1.66</b>   |
| PF03162            | Y_phosphatase2       | 2             | 13.35        | 1.25          |
| PF13292            | DXP_synthase_N       | 2             | 12.95        | 1.25          |
| PF01008            | IF-2B                | 40            | 12.86        | 1.19          |
| PF05706            | CDKN3                | 3             | 12.43        | 0.52          |
| PF07685            | GATase_3             | 68            | 12.3         | 1.35          |
| PF01255            | Prenyltransf         | 1             | 12.2         | 0             |
| PF04273            | DUF442               | 1             | 12           | 0             |
| PF00264            | Tyrosinase           | 1             | 11.9         | 0             |
| PF08544            | GHMP_kinases_C       | 1             | 11.8         | 0             |
| PF00265            | TK                   | 1             | 11.6         | 0             |
| PF01773            | Nucleos_tra2_N       | 1             | 11.5         | 0             |
| PF13527            | Acetyltransf_9       | 1             | 11.5         | 0             |
| PF13350            | Y_phosphatase3       | 1             | 11.5         | 0             |
| PF01040            | UbiA                 | 1             | 11.4         | 0             |
| PF13631            | Cytochrom_B_N_2      | 1             | 11.3         | 0             |
| PF00444            | Ribosomal_L36        | 24            | 11.1         | 0.46          |
| PF01048            | PNP_UDP_1            | 1             | 11           | 0             |
| PF00953            | Glycos_transf_4      | 1             | 11           | 0             |
| PF00089            | Trypsin              | 1             | 10.7         | 0             |
| PF01541            | GIY-YIG              | 1             | 10.2         | 0             |
| PF00083            | Sugar_tr             | 1             | 9.7          | 0             |
