# Supplementary material for: Protein Topology Determines Cysteine Oxidation Fate: The Case of Sulfenyl Amide Formation among Protein Families
Source: PubMed Central journal article supplement (PMC4351059; doi:10.1371/journal.pcbi.1004051), 2015-03-05
Supplement: pcbi.1004051.s018.pdf [file pcbi.1004051.s018.pdf]

**Table S7 .Structural and energetic parameters for the cyclic sulfenyl amide formation in water**

| Parameter                       | Peptide in water |        |         |
|---------------------------------|------------------|--------|---------|
| $\Delta E$                      | -1.5 kcal/mol    |        |         |
| Eact                            | 9 kcal/mol       |        |         |
|                                 | Reactive         | TS     | Product |
| N-CA-C-N+1                      | -155             | -154   | -109    |
| dSO                             | 1.73             | 2.23   | 2.4     |
| dNH                             | 1.03             | 1.58   | 2.63    |
| dSN                             | 2.81             | 1.92   | 1.83    |
| dH <sub>NH</sub> O <sub>w</sub> | 1.83             | 1.06   | 1.02    |
| qS                              | 0.012            | 0.018  | -0.16   |
| qOH                             | -0.158           | -0.032 | -0.028  |
| qH <sub>NH</sub>                | -0.16            | -0.044 | 0.002   |
| qN                              | 0.354            | 0.126  | 0.156   |
